# Supplementary material
Source: PubMed Central journal article supplement (PMC4919587)
Supplement: mmc1.pdf [file mmc1.pdf]

**Biophysical Journal, Volume 110**

**Supplemental Information**

**Evidence for Surface Recognition by a Cholesterol-Recognition  
Peptide**

**Masaru Mukai, Kerney Jebrell Glover, and Steven L. Regen**

# Evidence for Surface Recognition by a Cholesterol-Recognition (CRAC) Peptide

Masaru Mukai, Kerney Jebrell Glover and Steven L. Regen\*

Department of Chemistry, Lehigh University, Bethlehem, Pennsylvania 18015, United States

## Supporting information

### Table of Contents

|   |                                                         |       |
|---|---------------------------------------------------------|-------|
| 1 | General information.....                                | SI-2  |
| 2 | Experimental procedures.....                            | SI-3  |
|   | 2.1 Synthetic procedures.....                           | SI-3  |
|   | 2.2 Nearest-neighbor recognition (NNR) experiments..... | SI-6  |
| 3 | NMR spectra of compounds.....                           | SI-8  |
| 4 | Calibration of chromatographic system.....              | SI-10 |
| 5 | Data for NNR measurements.....                          | SI-13 |
| 6 | Fluorescence experiments.....                           | SI-16 |
|   | References.....                                         | SI-18 |

## **1. General information**

To determine the exchangeable dimer content in the nearest-neighbor recognition reactions, HPLC analysis was used with a 5  $\mu\text{m}$ , 4.6  $\times$  250 mm ultra-sphere 5 ODS column. The instrument used was a Waters Alliance HPLC system consisting of a Waters 717 plus auto sampler, a Waters 1525 binary HPLC pump and a Waters 2487 Dual  $\lambda$  Absorbance detector.  $^1\text{H}$  NMR spectra were recorded on a Bruker Avance 500 MHz instrument. All mass spectral measurements were performed by an Agilent LC-TOF high resolution TOF analyzer at the University of California-Riverside. Deionized water was purified by a Millipore Milli-Q filtering system having one carbon and two ion-exchange stages.

## 2. Experimental procedures

### 2.1 Synthetic procedures

The exchangeable dimers were prepared as shown in Scheme SI-1. The exchangeable dimer **Chol-Chol**, **Chol-Phos** and **Phos-Chol** were prepared as described elsewhere.<sup>1,2</sup> Compounds **1** and **2** were prepared as described elsewhere.<sup>2,3</sup> **Pep<sub>c</sub>-Phos** and **Pep<sub>c</sub>-Chol** were prepared as described elsewhere.<sup>4</sup>

**Scheme SI-1**

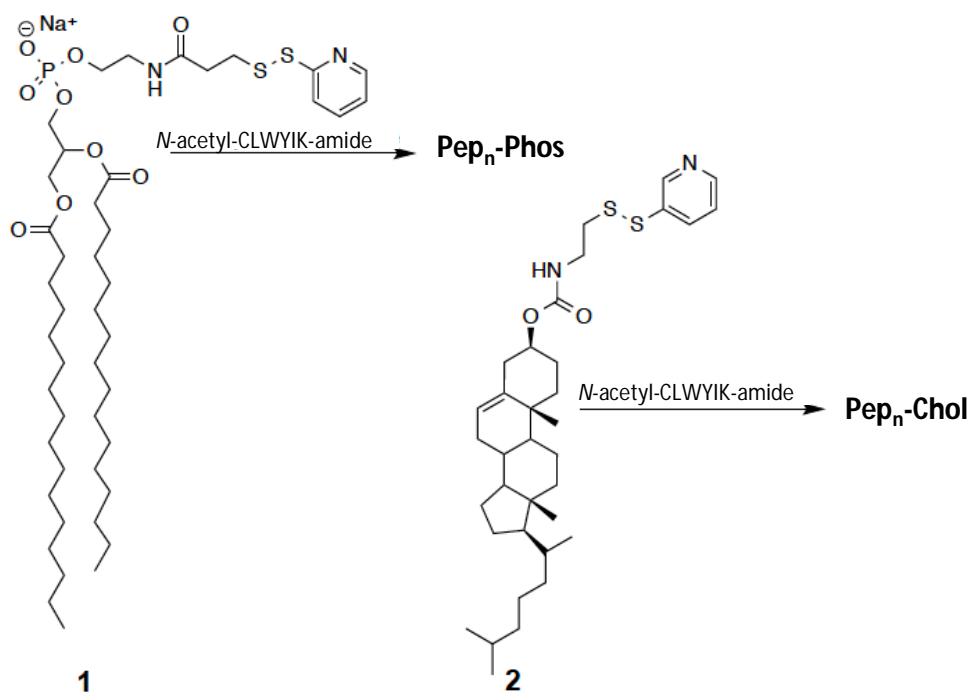

**Compound Pep<sub>n</sub>-Phos:** The peptide monomer *N*-acetyl-CLWYIK-amide (58 mg, 66.9 μmol, GenScript, Corp., Piscataway, NJ) in DMF (0.5 mL) was added dropwise to a solution of compound **1** (43 mg, 70 μmol) in 1 mL of CHCl<sub>3</sub> (1 mL). The resulting mixture was stirred overnight at room temperature under an atmosphere of argon. The crude product was purified by column chromatography (silica gel, CHCl<sub>3</sub> : MeOH : H<sub>2</sub>O = 2/1/0.1, v/v/v) affording typical yields of ca. 40% of **Pep<sub>n</sub>-Phos** having <sup>1</sup>H NMR (CDCl<sub>3</sub> : d-methanol = 2 : 1, v/v, 500 MHz, 22.5 °C) δ ppm: 0.81-0.93 (m, 18 H, Leu-δCH<sub>3</sub>, Ile-γCH<sub>3</sub>, Ile-δCH<sub>3</sub>, CH<sub>2</sub>CH<sub>2</sub>(CH<sub>2</sub>)<sub>12</sub>CH<sub>3</sub>), 1.33-1.75 (m, 50 H, Ile-γCH<sub>2</sub>, CH<sub>2</sub>CH<sub>2</sub>(CH<sub>2</sub>)<sub>12</sub>CH<sub>3</sub>), 1.35-2.03 (m, 13 H, any-CβH, Leu-γCH, Ile-γCH<sub>2</sub>, Lys-γCH<sub>2</sub>, Lys-δCH<sub>2</sub>, CH<sub>2</sub>CH<sub>2</sub>(CH<sub>2</sub>)<sub>12</sub>CH<sub>3</sub>), 2.03 (s, 3 H, Acetyl), 2.28 (br q, 4 H, CH<sub>2</sub>CH<sub>2</sub>(CH<sub>2</sub>)<sub>12</sub>CH<sub>3</sub>), 2.49-2.66 (br m, 2 H, C=OCH<sub>2</sub>CH<sub>2</sub>S), 2.69-3.02 (m, 7 H, C=OCH<sub>2</sub>CH<sub>2</sub>S, any-CβH, Lys-εCH<sub>2</sub>, overlap DMF peak), 3.41 (t, 2 H, <sup>3</sup>J = 5.5 Hz, CH<sub>2</sub>N), 3.36-3.45 (m, 2 H, any-CβH), 3.83-4.09 (m, 6 H, CH<sub>2</sub>OPOCH<sub>2</sub>, CH<sub>2</sub>CH, any-αCH), 4.09-4.19 (m, 2 H, any-αCH), 4.32-4.30 (m, 1 H, any-αCH), 4.37 (br, 1 H, CH<sub>2</sub>CH), 4.04-4.53 (m, 2 H, any-αCH), 5.21 (s, 1 H, overlap water peak, CH<sub>2</sub>CH), 6.41-6.58 (m, 3 H, Tyr-Ar, (CH<sub>2</sub>)<sub>2</sub>NH), 6.95 (d, 2 H, <sup>3</sup>J = 8.4 Hz, Tyr-Ar), 7.04 (t, 1 H, <sup>3</sup>J = 7.3 Hz, Tyr-Ar), 7.08-7.17 (m, 2 H, Tyr-Ar), 7.33 (d, 1 H, <sup>3</sup>J = 7.3 Hz, any amide), 7.35-7.41 (m, 2 H, Tyr-Ar), 7.48 (d, 1 H, overlap CHCl<sub>3</sub>, each amide), 7.57 (d, 1 H, <sup>3</sup>J = 5.1 Hz, any amide), 7.82 (d, 1 H, <sup>3</sup>J = 8.1 Hz, any amide), 8.45 (d, 1 H, <sup>3</sup>J = 4.4 Hz, any amide) and HR-ESI MS for C<sub>83</sub>H<sub>138</sub>N<sub>10</sub>O<sub>17</sub>PS<sub>2</sub> ([M-Na]<sup>+</sup>) Calculated: 1641.9426; Found: 1641.9395.

**Compound Pep<sub>n</sub>-Chol:** The peptide monomer *N*-acetyl-CLWYIK-amide (76 mg, 120 μmol, GenScript, Corp., Piscataway, NJ) in DMF (1 mL) was added drop wise to solution of compound **2** (100 mg, 120 μmol) in CHCl<sub>3</sub> (1 mL). The resulting mixture was stirred overnight at room temperature under an atmosphere of argon. The crude product was purified by column chromatography (silica gel, CHCl<sub>3</sub> : MeOH : H<sub>2</sub>O = 3/1/0.1, v/v/v) affording typical yields of ca. 40% of **Pep<sub>n</sub>-Phos** having <sup>1</sup>H NMR (CDCl<sub>3</sub> : d-methanol = 2 : 1, v/v, 500 MHz, 22.5 °C) δ ppm: 0.64 (s, 3H, Cholesterol-13C methyl), 0.84-1.60 (m, 34H, any cholesterol, Leu-δCH<sub>3</sub>, Ile-γCH<sub>3</sub>), 0.84-1.60 (m, 21H, any cholesterol, any-CβH, Ile-δCH<sub>3</sub>, Ile-γCH<sub>2</sub>, Leu-γCH, Ile-γCH<sub>2</sub>, Lys-γCH<sub>2</sub>, Lys-δCH<sub>2</sub>), 1.60-2.06 (m, 12 H, any cholesterol, Acetyl, any-CβH), 2.19-3.05 (m, 10H, Cholesterol-4CH<sub>2</sub>, any-CβH, SCH<sub>2</sub>CH<sub>2</sub>, Lys-εCH<sub>2</sub>), 3.05-3.26 (m, 3 H, SCH<sub>2</sub>CH<sub>2</sub> any-

C $\beta$ H), 3.03-3.28 (m, 2 H, any-C $\beta$ H), 3.83-4.02 (m, 2 H, any- $\alpha$ CH), 4.09-4.26 (m, 3 H, any- $\alpha$ CH), 4.55-4.69 (br, 1 H, any- $\alpha$ CH, overlap methanol), 5.31 (s, 1 H, Cholesterol-6CH), 6.72 (d, 2H,  $^3J = 7.3$  Hz, Tyr-Ar), 7.04 (s, 1 H, Typ-Ar), 6.92 (d, 2 H,  $^3J = 7.3$  Hz, Tyr-Ar), 7.00-7.19 (m, 3 H, Typ-Ar), 7.32-7.51 (m, 4 H, overlap CHCl<sub>3</sub>, Typ-Ar, any-*amide*), 7.56 (d, 1 H,  $^3J = 5.4$  Hz, any *amide*), 7.75 (d, 1 H,  $^3J = 6.6$  Hz, any *amide*) and HR-ESI MS for C<sub>73</sub>H<sub>113</sub>N<sub>10</sub>O<sub>10</sub>S<sub>2</sub> ([M+H]<sup>+</sup>) Calculated: 1353.8077; Found: 1353.8116

## 2.2 Nearest-neighbor recognition (NNR) experiments

Thin films of lipid were prepared by evaporating a chloroform solution containing 0.15  $\mu\text{mol}$  [**Pep<sub>n</sub>-Chol**], 0.15  $\mu\text{mol}$  [**Pep<sub>n</sub>-Phos**] and varying amounts of DPPC and cholesterol under a stream of argon. After drying the thin film overnight under reduced pressure (0.4 mm Hg), 2.0 mL of a 10 mM Tris-HCl buffer (10 mM Tris, 500 mM NaCl, 2 mM NaN<sub>3</sub>, 1 mM EDTA, pH = 7.4), a 60  $\mu\text{L}$  aliquot of 1.68  $\mu\text{M}$  monesin and dithiothreitol (15  $\mu\text{L}$  of a 19.8 mM solution in pH 7.4 Tris buffer, 1 eq. with respect to disulfide content) were added to each of the dried films. The mixtures were then vortexed every 5 min for 30 s over a time span of 30 min with intermittent incubation at 60 °C. Following this, the dispersions were subjected to six freeze/thaw cycles (liquid nitrogen/60 °C water bath). The vesicle dispersions (2 mL) were heated to 45 °C, and oxygen was removed by purging with argon. A sufficient amount of 0.1 M NaOH (63  $\mu\text{L}$ ) was added to bring the pH to 7.4 (after adjusting the temperature to 45 °C) to start the exchange reaction.

Aliquots (400  $\mu\text{L}$ ) were withdrawn as a function of time and the exchange reactions were quenched by adding 25  $\mu\text{L}$  of 8.3 M acetic acid and vortexing. These aliquots were quickly frozen, using liquid nitrogen and stored at -20 °C until HPLC analysis was carried out. For HPLC analysis, to each thawed aliquot was added 2000  $\mu\text{L}$  of CHCl<sub>3</sub>/MeOH (2:1 v/v) and Aldrithiol-2 (2,2-dipyridyldisulfide, 74  $\mu\text{L}$  of a 10 mM solution in CHCl<sub>3</sub>). The tubes were vortexed, centrifuged, and the aqueous phases removed using a Pasteur pipette. The organic phase was then concentrated under reduced pressure using a Savant SVC-100 SpeedVac concentrator equipped with a cold trap and vacuum pump (~1 hr at ~0.4 Torr). The residual compounds were dissolved in 60  $\mu\text{L}$  of CHCl<sub>3</sub> and 140  $\mu\text{L}$  of the HPLC mobile phase for analysis of [**Pep<sub>n</sub>-Chol**] and [**Pep<sub>n</sub>-Phos**]. The solution was divided into two tubes (each 100  $\mu\text{L}$ ).

The concentrations of [**Chol-Chol**], [**Phol-Phos**] and [**Chol-Phos**] were analyzed by HPLC using a Symmetry C<sub>18</sub> 5  $\mu\text{m}$  reversed phase column. The analysis was done in an isocratic mode using a mobile phase consisting of 760 mL of EtOH, 120 mL of deionized H<sub>2</sub>O, 100 mL of hexane, and 10 mL 1 M aq. N(n-Bu)<sub>4</sub>OAc. The flow-rate was 0.9 ml/min, the column temperature was 31 °C, and detection was done at 203 nm.

The concentrations of [**Pep<sub>n</sub>-Chol**] and [**Pep<sub>n</sub>-Phos**] were analyzed by HPLC using a Symmetry C<sub>18</sub> 5  $\mu\text{m}$  reversed phase column. The analysis was done in an isocratic mode using a mobile phase consisting of 890 mL of EtOH, 100 mL of deionized H<sub>2</sub>O, 1 mL of

TFA, and 10 mL 1 M aq. N(n-Bu)<sub>4</sub>OAc. The flow-rate was 0.9 ml/min, the column temperature was 31 °C, and detection was done at 280 nm.

In this study, liposomes that were rich in cholesterol were prepared from DPPC/cholesterol/Pep<sub>n</sub>-Phos/Pep<sub>n</sub>-Chol (57.5/37.5/1.25/1.25, mol/mol/mol/mol; cholesterol-poor analogs were made from DPPC/Pep<sub>n</sub>-Phos/Pep<sub>n</sub>-Chol (95.0/1.25/1.25, mol/mol/mol).



### 3. NMR spectra of compounds

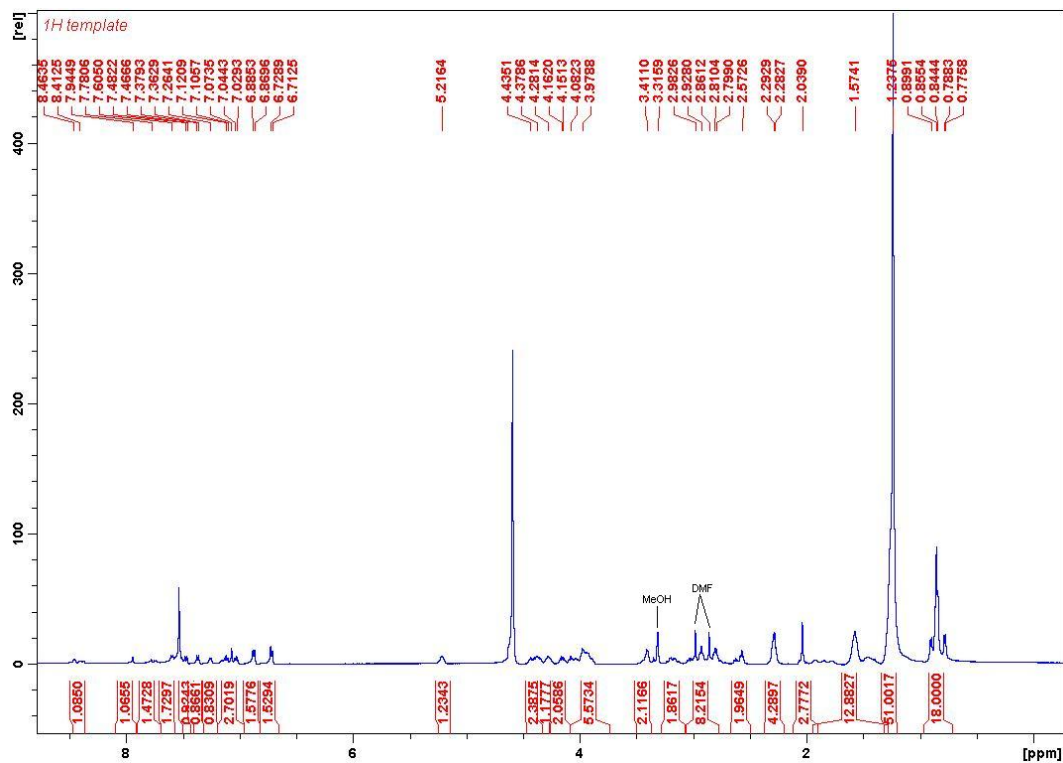

Figure SI-1: <sup>1</sup>H NMR spectrum of Pep<sub>n</sub>-Phos

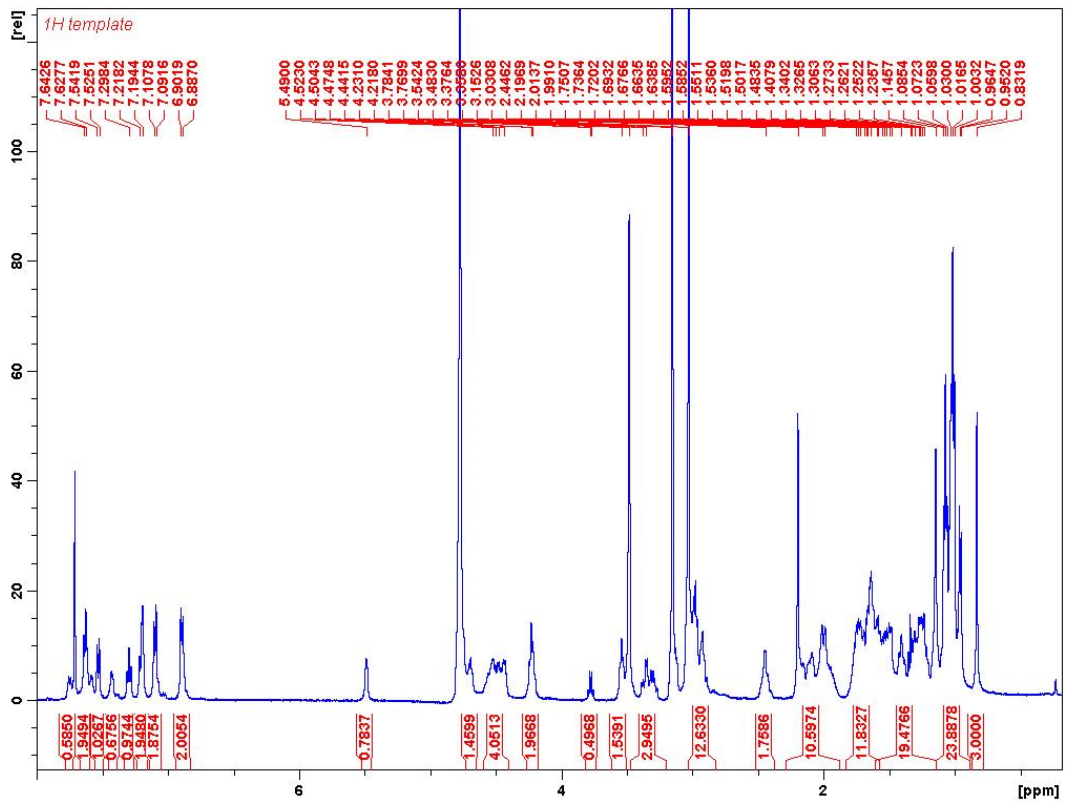

Figure SI-2:  $^1\text{H}$  NMR spectrum of Pep<sub>n</sub>-Chol

#### 4. Calibration of chromatographic system

The chromatographic system was calibrated by injecting various known amounts of the specific dimers in eluent and analyzed by HPLC. The system was found to respond as follows: for **[Phos-Phos]**,  $478140 \times n[\text{Phos-Phos}] - 518 = \text{Signal}$  ( $R^2 = 0.9984$ ); for **[Chol-Chol]**,  $591890 \times n[\text{Chol-Chol}] - 90867 = \text{Signal}$  ( $R^2 = 0.9988$ ); for **[Chol-Phos]**,  $533520 \times n[\text{Chol-Phos}] - 12637 = \text{Signal}$  ( $R^2 = 0.9988$ ) ; for **[Pep<sub>n</sub>-Phos]**,  $2279499 \times n[\text{Pep}_n\text{-Phos}] + 78797 = \text{Signal}$  ( $R^2 = 0.9990$ ) ; for **[Pep<sub>n</sub>-Chol]**,  $290097 \times n[\text{Pep}_n\text{-Chol}] + 33510 = \text{Signal}$  ( $R^2 = 0.9992$ ). Where signal is the area of the peaks for the dimers and  $n[\text{Phos-Phos}]$ ,  $n[\text{Chol-Chol}]$ ,  $n[\text{Chol-Phos}]$ ,  $n[\text{Pep}_n\text{-Phos}]$ ,  $n[\text{Pep}_n\text{-Chol}]$  are the number of nmol of the dimers. Calibration data for **[Pep<sub>n</sub>-Phos]**, **[Pep<sub>n</sub>-Chol]** are given in Table SI-2 and the calibration curves are shown in Figure SI-3. Details for the calibration of **[Chol-Chol]**, **[Chol-Phos]**, **[Phos-Phos]** were shown in previous publications.<sup>4,5</sup>

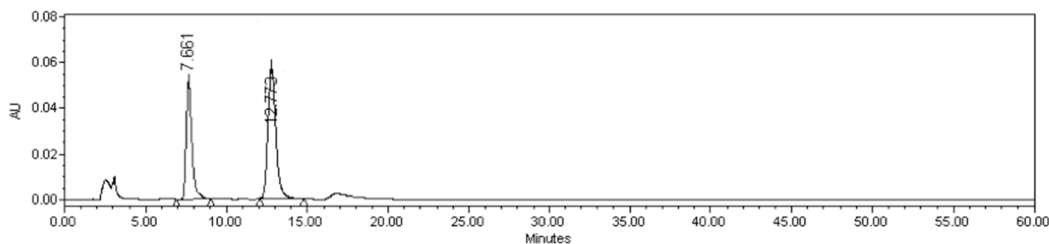

**Figure SI-3:** A sample chromatogram of **Pep<sub>n</sub>-Chol** (Retention time: 7.66 min) and **Pep<sub>n</sub>-Phos** (Retention time: 12.77 min).

**Table SI-1:** Data for calibration curves of **Pep<sub>n</sub>-Chol.**

| nmol | Area    |         |         |
|------|---------|---------|---------|
|      | run1    | run2    | run3    |
| 9.65 | 2995492 | 2650169 | 2779992 |
| 4.82 | 1458704 | 1505427 | 1465802 |
| 2.41 | 742155  | 770430  | 747029  |
| 1.21 | 388958  | 405141  | 355959  |
| 0.60 | 201200  | 230850  | 200446  |
| 0    | 12222   | -12841  | -11727  |

**Table SI-2:** Data for calibration curves of **Pep<sub>n</sub>-Phos.**

| nmol | Area    |         |         |
|------|---------|---------|---------|
|      | run1    | run2    | run3    |
| 14.0 | 3944933 | 4038905 | 3964580 |
| 7.0  | 2007459 | 2030981 | 2025342 |
| 3.5  | 1086574 | 1149249 | 1062515 |
| 1.8  | 590421  | 626501  | 568251  |
| 0.78 | 363124  | 314176  | 317288  |
| 0    | 127     | -12744  | 1050    |

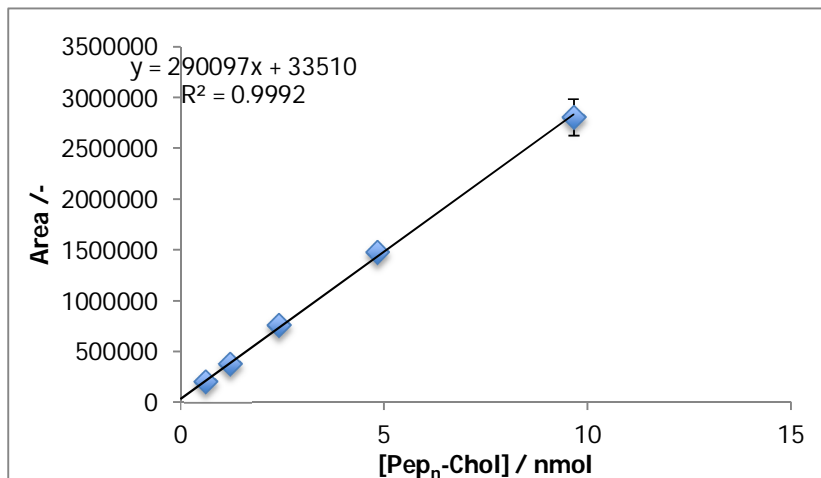

|                | Slope  | Intercept |
|----------------|--------|-----------|
| Parameter      | 290097 | 33510     |
| Std. Dev       | 4958   | 22556     |
| R <sup>2</sup> | 0.9953 | 69687     |

**Figure SI-4:** Calibration curves for **Pep<sub>n</sub>-Chol**

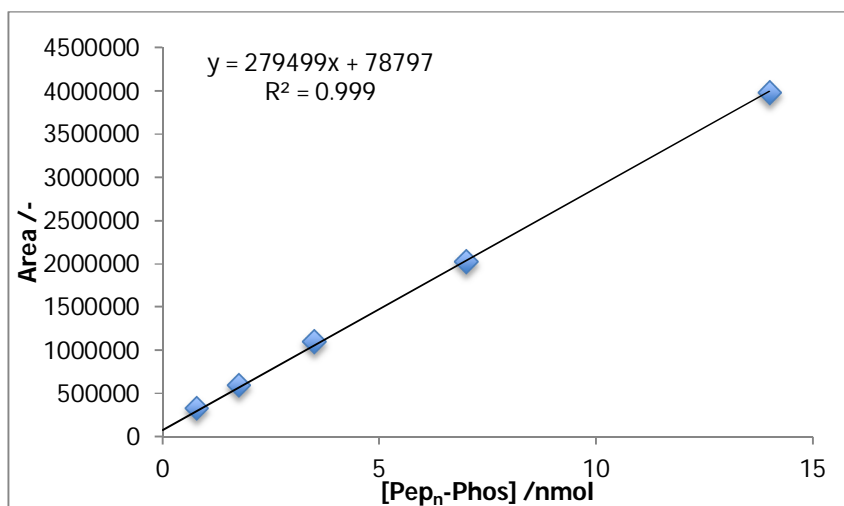

|                | Slope  | Intercept |
|----------------|--------|-----------|
| Parameter      | 279499 | 78797     |
| Std. Dev       | 2607   | 17194     |
| R <sup>2</sup> | 0.9986 | 53279     |

**Figure SI-5:** Calibration curves for **Pep<sub>n</sub>-Phos**

## 5. Data for NNR measurements

**Table SI-3:** Concentration of exchangeable dimers after 48-hour reaction and resulting equilibrium constants ( $K_1$ ,  $K_2$  and  $K_3$ ), selectivity (S), and ratio (R: **Pep<sub>n</sub>-Chol/Pep<sub>n</sub>-Phos**) in the liquid-disordered state ( $l_d$ ).<sup>a</sup>

|                                                    | Area               |         |        |         | Average | Std. dev.               |
|----------------------------------------------------|--------------------|---------|--------|---------|---------|-------------------------|
|                                                    | run1               | run2    | run3   | run4    |         |                         |
| <b>Phos-Phos</b>                                   | 541315             | 711129  | 583180 | 634588  | 617553  | 88469                   |
| <b>Phos-Chol</b>                                   | 846178             | 1035772 | 800494 | 1026648 | 927273  | 124759                  |
| <b>Chol-Chol</b>                                   | 442521             | 555770  | 439926 | 478180  | 479099  | 66146                   |
| <b>Pep<sub>n</sub>-Chol</b>                        | 343834             | 480894  | 537629 | 434773  | 449283  | 99633                   |
| <b>Pep<sub>n</sub>-Phos</b>                        | 197600             | 276950  | 262724 | 216011  | 238321  | 42308                   |
|                                                    | $l_d$ phase (nmol) |         |        |         | Average | Std. Error <sup>a</sup> |
|                                                    | run1               | run2    | run3   | run4    |         |                         |
| <b>Phos-Phos</b>                                   | 1.13               | 1.49    | 1.22   | 1.32    | 1.29    | 0.20                    |
| <b>Phos-Chol</b>                                   | 1.61               | 1.97    | 1.52   | 1.94    | 1.76    | 0.20                    |
| <b>Chol-Chol</b>                                   | 0.90               | 1.26    | 0.90   | 0.96    | 1.00    | 0.22                    |
| <b>Pep<sub>n</sub>-Chol</b>                        | 1.07               | 1.54    | 1.73   | 1.57    | 1.48    | 0.20                    |
| <b>Pep<sub>n</sub>-Phos</b>                        | 0.42               | 0.70    | 0.65   | 0.75    | 0.63    | 0.12                    |
| <b>Pep<sub>n</sub>-Pep<sub>n</sub><sup>b</sup></b> | 2.84               | 3.73    | 2.88   | 3.25    | 3.18    | 0.41                    |
| $K_1=$                                             | -                  | -       | -      | -       | 0.68    | 0.25                    |
| $K_2=$                                             | -                  | -       | -      | -       | 0.10    | 0.04                    |
| $K_3=$                                             | -                  | -       | -      | -       | 2.39    | 0.83                    |
| Ratio=                                             | -                  | -       | -      | -       | 2.34    | 0.55                    |
| S=                                                 | -                  | -       | -      | -       | 7.01    | 3.99                    |

<sup>a</sup> Standard errors for concentrations were calculated from the standard deviation of the Y value average and the standard errors of the slope and intercept of the calibration curve.<sup>4</sup>

<sup>b</sup> **Pep<sub>n</sub>-Pep<sub>n</sub>** amounts were estimated using mass balance, and represent maximum values.

**Table SI-4:** Concentration of exchangeable dimers after 48-hour reaction and resulting equilibrium constants ( $K_1$ ,  $K_2$  and  $K_3$ ), selectivity (S), and ratio (R: **Pep<sub>n</sub>-Chol/Pep<sub>n</sub>-Phos**) in the liquid-ordered state ( $l_o$ ).<sup>a</sup>

|                                                    | Area               |         |         |         | Average | Std. dev.               |
|----------------------------------------------------|--------------------|---------|---------|---------|---------|-------------------------|
|                                                    | run1               | run2    | run3    | run4    |         |                         |
| <b>Phos-Phos</b>                                   | 266162             | 204759  | 403853  | 403853  | 291591  | 101954                  |
| <b>Phos-Chol</b>                                   | 1327009            | 1058385 | 1698367 | 1698367 | 1361254 | 321362                  |
| <b>Chol-Chol</b>                                   | 526755             | -       | 673023  | 673023  | 522096  | 153310                  |
| <b>Pep<sub>n</sub>-Chol</b>                        | 318788             | 402852  | 556355  | 632420  | 425998  | 120463                  |
| <b>Pep<sub>n</sub>-Phos</b>                        | 315504             | 376152  | 467213  | 539011  | 386290  | 76361                   |
|                                                    | $l_o$ phase (nmol) |         |         |         |         |                         |
|                                                    | run1               | run2    | run3    | run4    | Average | Std. Error <sup>a</sup> |
| <b>Phos-Phos</b>                                   | 0.56               | 0.43    | 0.85    | 0.85    | 0.67    | 0.25                    |
| <b>Phos-Chol</b>                                   | 2.51               | 2.01    | 3.21    | 3.21    | 2.73    | 0.20                    |
| <b>Chol-Chol</b>                                   | 1.04               | -       | 1.29    | 1.29    | 1.21    | 0.27                    |
| <b>Pep<sub>n</sub>-Chol</b>                        | 1.16               | 1.46    | 1.80    | 2.06    | 1.62    | 0.20                    |
| <b>Pep<sub>n</sub>-Phos</b>                        | 1.10               | 1.31    | 1.39    | 1.64    | 1.36    | 0.28                    |
| <b>Pep<sub>n</sub>-Pep<sub>n</sub><sup>b</sup></b> | 2.86               | -       | 3.74    | 3.74    | 3.24    | 0.51                    |
| $K_1=$                                             | -                  | -       | -       | -       | 0.67    | 0.25                    |
| $K_2=$                                             | -                  | -       | -       | -       | 0.85    | 0.49                    |
| $K_3=$                                             | -                  | -       | -       | -       | 9.23    | 4.22                    |
| Ratio=                                             | -                  | -       | -       | -       | 1.19    | 0.29                    |
| S=                                                 | -                  | -       | -       | -       | 0.79    | 0.54                    |

<sup>a</sup> Standard errors for concentrations were calculated from the standard deviation of the Y value average and the standard errors of the slope and intercept of the calibration curve.<sup>4</sup>

<sup>b</sup> **Pep<sub>n</sub>-Pep<sub>n</sub>** amounts were estimated using mass balance, and represent maximum values.

**Table SI-5:** Data for equilibration in liquid-disordered state at 45 °C

| time<br>(h) |                             | Concentration (nmol) |      |      |      |                    |                    |
|-------------|-----------------------------|----------------------|------|------|------|--------------------|--------------------|
|             |                             | run1                 | run2 | run3 | run4 | average            | std.               |
| 0 h         | <b>Pep<sub>n</sub>-Chol</b> | 3.70                 | 3.99 | 4.52 | -    | 1.14 <sup>a)</sup> | 0.17 <sup>a)</sup> |
|             | <b>Pep<sub>n</sub>-Phos</b> | 3.01                 | 3.91 | 3.82 | -    |                    |                    |
|             | <b>Phos-Chol</b>            | 0.66                 | 0.63 | 0.67 | -    |                    |                    |
| 6 h         | <b>Pep<sub>n</sub>-Chol</b> | 3.29                 | 3.57 | 3.82 | -    | 1.92 <sup>a)</sup> | 0.14 <sup>a)</sup> |
|             | <b>Pep<sub>n</sub>-Phos</b> | 1.78                 | 1.98 | 1.80 | -    |                    |                    |
|             | <b>Phos-Chol</b>            | 1.40                 | 1.39 | 1.34 | -    |                    |                    |
| 24 h        | <b>Pep<sub>n</sub>-Chol</b> | 0.97                 | 2.49 | -    | -    | 2.39 <sup>a)</sup> | 1.41 <sup>a)</sup> |
|             | <b>Pep<sub>n</sub>-Phos</b> | 0.72                 | 0.75 | 0.70 | -    |                    |                    |
|             | <b>Phos-Chol</b>            | 2.35                 | 1.53 | 1.83 | -    |                    |                    |
| 48 h        | <b>Pep<sub>n</sub>-Chol</b> | 1.07                 | 1.54 | 1.73 | 1.57 | 2.34 <sup>a)</sup> | 0.55 <sup>a)</sup> |
|             | <b>Pep<sub>n</sub>-Phos</b> | 0.42                 | 0.70 | 0.65 | 0.75 |                    |                    |
|             | <b>Phos-Chol</b>            | 1.61                 | 1.97 | 1.52 | 1.94 |                    |                    |

a)  $[\text{Pep}_n\text{-Chol}] / [\text{Pep}_n\text{-Phos}]$



**Table SI-6:** Data for equilibration in liquid-ordered state at 45 °C

| time<br>(h) |                             | Concentration (nmol) |       |       |      |                    |                    |
|-------------|-----------------------------|----------------------|-------|-------|------|--------------------|--------------------|
|             |                             | run1                 | run2  | run3  | run4 | average            | std.               |
| 0 h         | <b>Pep<sub>n</sub>-Chol</b> | 10.10                | 10.40 | 10.30 | -    | 0.99 <sup>a)</sup> | 0.02 <sup>a)</sup> |
|             | <b>Pep<sub>n</sub>-Phos</b> | 10.30                | 10.30 | 10.43 | -    |                    |                    |
|             | <b>Phos-Chol</b>            | 0.46                 | 0.13  | 0.40  | -    |                    |                    |
| 6 h         | <b>Pep<sub>n</sub>-Chol</b> | 1.31                 | 2.10  | 1.38  | -    | 0.91 <sup>a)</sup> | 0.50 <sup>a)</sup> |
|             | <b>Pep<sub>n</sub>-Phos</b> | 0.95                 | 2.26  | 2.03  | -    |                    |                    |
|             | <b>Phos-Chol</b>            | 1.76                 | 1.80  | 2.13  | -    |                    |                    |
| 24 h        | <b>Pep<sub>n</sub>-Chol</b> | 1.19                 | 1.57  | 1.38  | -    | 1.09 <sup>a)</sup> | 0.21 <sup>a)</sup> |
|             | <b>Pep<sub>n</sub>-Phos</b> | 1.04                 | 1.43  | 1.33  | -    |                    |                    |
|             | <b>Phos-Chol</b>            | 2.36                 | 2.18  | 1.15  | -    |                    |                    |
| 48 h        | <b>Pep<sub>n</sub>-Chol</b> | 1.16                 | 1.46  | 1.80  | 2.06 | 1.19 <sup>a)</sup> | 0.29 <sup>a)</sup> |
|             | <b>Pep<sub>n</sub>-Phos</b> | 1.10                 | 1.31  | 1.39  | 1.64 |                    |                    |
|             | <b>Phos-Chol</b>            | 2.51                 | 2.01  | 3.21  | 3.21 |                    |                    |

a)  $[\text{Pepn-Chol}] / [\text{Pepn-Phos}]$

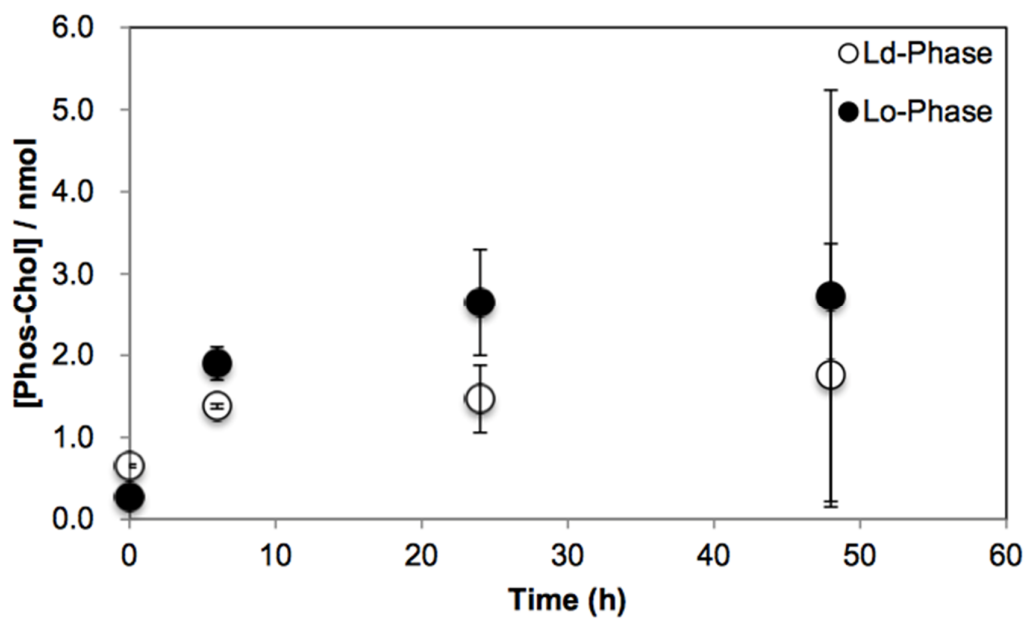

**Figure SI-6.** Plot of the formation of {Phos-Chol} as a function of time at 45 °C in (●) cholesterol-rich and (○) cholesterol-poor bilayers. Cholesterol-rich vesicles were made from DPPC/cholesterol/Pep<sub>n</sub>-Phos/Pep<sub>n</sub>-Chol with a molar ratio of 57.5/37.5/1.25/1.25. Cholesterol-poor vesicles were made from DPPC/Pep<sub>n</sub>-Phos/Pep<sub>n</sub>-Chol having a molar ratio of 95.0/1.25/1.25.

## 6. Fluorescence experiments

Thin films of lipid were prepared by evaporating a chloroform solution containing 0.3  $\mu\text{mol}$  of peptide conjugate (Pep<sub>n</sub>-Chol, Pep<sub>n</sub>-Phos, Pep<sub>c</sub>-Chol or Pep<sub>c</sub>-Phos) and 11.4  $\mu\text{mol}$  of DPPC under a stream of argon. After drying the thin film overnight under reduced pressure (0.4 mm Hg), 2.0 mL of a 10 mM Tris-HCl buffer (10 mM Tris, 150 mM NaCl, 2 mM NaN<sub>3</sub>, 1 mM EDTA, pH = 7.4) was added to each of the dried films. The mixtures were then vortexed every 5 min for 30 s over a time span of 30 min with intermittent incubation at 60 °C. Following this, the dispersions were subjected to six freeze/thaw cycles (liquid nitrogen/60 °C water bath) and extruded 15 times through a 100 nm pore diameter polycarbonate filter (Nuclepore, Whatman Inc.) using argon at a pressure of ~100 psi. Steady-state fluorescence emission spectra were acquired at 318 K using an Varian Eclipse fluorescence spectrophotometer (Agilent, Santa Clara, CA) using a 1 × 0.1 cm quartz cuvette. The excitation wavelength was 295 nm which selectively excites tryptophan residues. Both excitation and emission slits were set to 5 nm. The emission spectrum was measured from 310-400 nm with a scan speed of 2 nm/s and 1.0 nm data point increments, averaging 16 scans. The  $\lambda_{\text{max}}$  values were determined by fitting the data to a log-normal distribution using Igor Pro 6.3.7.2 (WaveMetrics, Inc., Lake Oswego, OR).

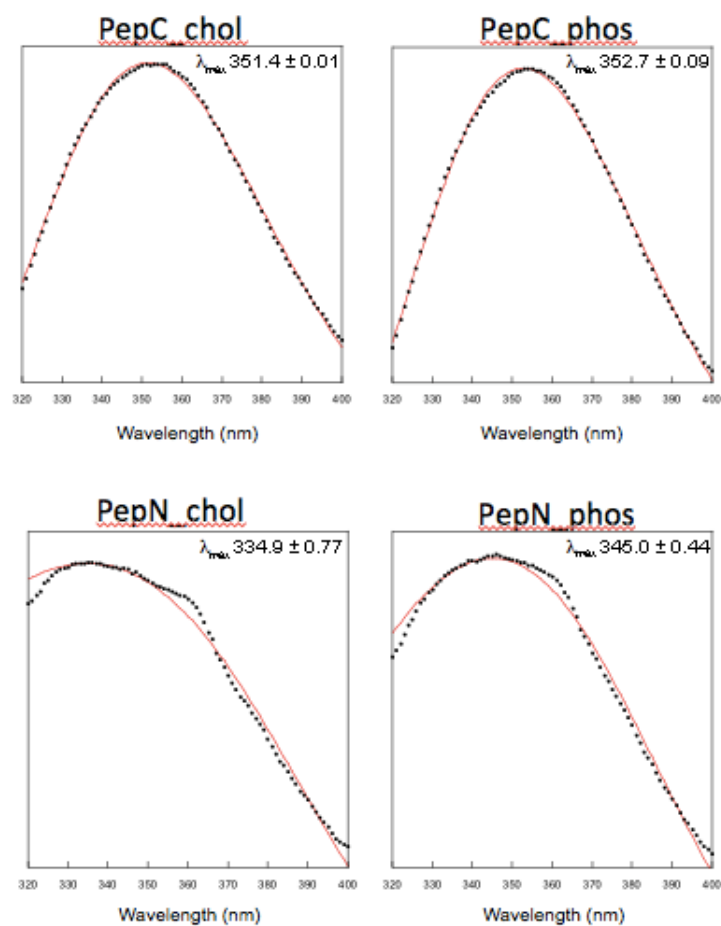

**Figure SI-7** Tryptophan emission spectra with excitation at 295 nm of CRAC peptide conjugated compounds in DPPC liposomes at 45°C. Data points are in black and the Fit line is shown in red.

## 7. References

- 1) Krisovitch, S. M.; Regen, S. L. *J. Am. Chem. Soc.* **1992**, *114*, 9828-9835.
- 2) Sugahara, M.; Uragami, M.; Yan, X.; Regen, S. L. *J. Am. Chem. Soc.* **2001**, *123*, 7939-7940.
- 3) Daly, T. A.; Almeida, P. F.; Regen, S. L. *J. Am. Chem. Soc.* **2012**, *134*, 17245-17252.
- 4) Mukai, M.; Krause, M. R.; Regen, S. L. *J. Am. Chem. Soc.*, **2015**, *137*, 12518-12520.
- 5) Turkyilmaz, S.; Chen, WH; Mitomo, H.; Regen, S.L. *J. Am. Chem. Soc.* **2009**, *131*, 5068-5069.
