# Supplementary material
Source: PubMed Central journal article supplement (PMC4919587)
Supplement: mmc2.pdf [file mmc2.pdf]

# Evidence for Surface Recognition by a Cholesterol-Recognition Peptide

Masaru Mukai,<sup>1</sup> Kerney Jebrell Glover,<sup>1</sup> and Steven L. Regen<sup>1,\*</sup>

<sup>1</sup>Department of Chemistry, Lehigh University, Bethlehem, Pennsylvania

**ABSTRACT** Two cholesterol recognition/interaction amino-acid consensus peptides, *N*-acetyl-LWYIKC-amide, and *N*-acetyl-CLWYIK-amide, have been coupled to exchangeable mimics of Chol (cholesterol) and Phos (1,2-dipalmitoyl-*sn*-glycerol-3-phospho-(1'*rac*-glycerol)) via disulfide bond formation. Equilibration between Chol and Phos via thiolate-disulfide interchange reactions has revealed that both peptides favor Chol as a nearest-neighbor in liquid-disordered ( $l_d$ ) bilayers to the same extent. In contrast, no Chol- or Phos-recognition could be detected by these peptides in analogous liquid-ordered ( $l_o$ ) bilayers. Fluorescence measurements of the tryptophan moiety have shown that both peptides favor the membrane-water interface. Taken together, these results provide strong evidence that the recognition behavior of the LWYIK motif is, fundamentally, a surface phenomenon but that partial penetration into the bilayer is also necessary.

Understanding how lipids and proteins interact with one another in cell membranes, and defining their time-averaged lateral organization, represent two major challenges presently facing cell biologists, biochemists, and biophysicists (1–4). Although it is widely believed that the two-dimensional structure of cell membranes plays a key role in the overall functioning of cells, it has proven difficult to characterize membrane organization at the molecular level even in the simplest of model systems.

One popular concept involving lipid-protein interactions that has emerged in recent years is based on the cholesterol recognition/interaction amino-acid consensus (CRAC) hypothesis (5–8). According to this hypothesis, those segments of an integral membrane protein that lie close to the membrane surface having the sequence (L/V)-X<sub>1-5</sub>-(Y)-X<sub>1-5</sub>-(K/R) have a special affinity toward cholesterol. Despite its popularity, experimental evidence in support of this hypothesis has been largely circumstantial.

We have recently begun a bottom-up approach to the study of the CRAC hypothesis, starting with the minimal CRAC peptide, LWYIK. This peptide was selected based on its simplicity and because it appears to play an important role in the fusion protein gp41 found in HIV-1 (7,8). Specifically, this highly conserved segment has been found to be a determinant for viral infection (7). In addition, there is significant evidence indicating that cholesterol in target cells is

required for fusion with HIV virions. This finding strongly suggests that LWYIK plays a critical role in the fusion process through its ability to associate with cholesterol in membranes.

To investigate the cholesterol-recognition properties of LWYIK at the molecular level, we have employed the nearest-neighbor recognition (NNR) method. As discussed elsewhere, NNR measurements afford unique thermodynamic insight into the interactions between membrane components (9). In brief, two membrane components of interest (A and B) are converted into exchangeable, disulfide-based homodimers (AA) and heterodimers (AB) and are allowed to undergo monomer exchange in host liposomes via thiolate-disulfide displacement reactions. Nearest-neighbor recognition is then reflected by an equilibrium constant,  $K$ , that differs from 4.0 (random mixing) where  $K = (AB)^2/(AA)(BB)$ .

Recently, we have shown that LWYIK, having Cys attached to its C-terminus (i.e., Pep<sub>c</sub>), favors association with an exchangeable sterol (Chol, cholesterol) over an exchangeable phospholipid (Phos, 1,2-dipalmitoyl-*sn*-glycerol-3-phospho-(1'*rac*-glycerol)) in the liquid-disordered ( $l_d$ ) state (Fig. 1) (10). However, no such recognition by Pep<sub>c</sub> could be detected in the liquid-ordered ( $l_o$ ) state. Negative control experiments that were carried out with a non-CRAC peptide, VGVAPG (found in elastin), showed no nearest-neighbor preference for Chol or Phos in either the  $l_d$  or the  $l_o$  phases (10).

Here, we sought to test the hypothesis that the recognition behavior of LWYIK is largely confined to the membrane surface. In principle, if such recognition were a surface

Submitted March 10, 2016, and accepted for publication May 6, 2016.

\*Correspondence: slr0@lehigh.edu

Editor: Kalina Hristova.

<http://dx.doi.org/10.1016/j.bpj.2016.05.007>

© 2016 Biophysical Society.

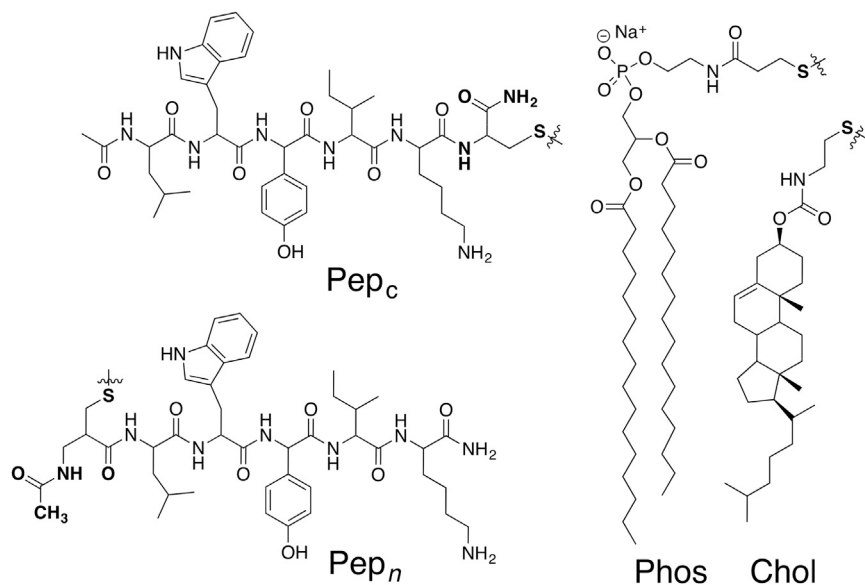

**FIGURE 1** Structures of exchangeable lipids and peptides.

phenomenon where the CRAC motif wraps around the A-ring of the sterol nucleus, as has been previously proposed, then a similar degree of recognition would be expected when the peptide is attached via its N-terminus ( $\text{Pep}_n$ ) as compared with this C terminus ( $\text{Pep}_c$ ) (8). For both modes of attachment, the peptide's hydrophobic- and hydrogen bond-interactions with the A-ring should be similar. However, if the peptide were to extend into the bilayer, then different amino acids would be interacting with the same segments of a neighboring sterol nucleus, and, a different degree of recognition is expected.

To probe this question, we synthesized four lipid conjugates of LWYIK: i.e.,  $\{\text{Pep}_c\text{-Phos}\}$ ,  $\{\text{Pep}_c\text{-Chol}\}$ ,  $\{\text{Pep}_n\text{-Phos}\}$ , and  $\{\text{Pep}_n\text{-Chol}\}$ , where each dimer bears a disulfide linkage (Fig. 1). These conjugates were readily prepared via thiolate-disulfide interchange between *N*-acetyl-LWYIKC-amide and *N*-acetyl-CLWYIK-amide with the activated lipids, **1** and **2** (Fig. 2).

To determine whether  $\text{Pep}_n$  is capable of favoring Chol over Phos, we carried out NNR measurements both in host membranes made from DPPC (1,2-dipalmitoyl-*sn*-glycerol-3-phosphocholine) and in ones made from DPPC

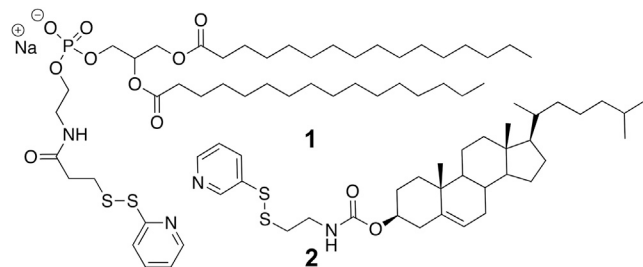

**FIGURE 2** Activated forms of Phos and Chol.

that were rich in cholesterol, at 45°C. The former were in the  $l_d$  phase and the latter were in the  $l_o$  phase (11). The progress of the interchange was monitored by following the molar ratio of  $\{\text{Pep}_n\text{-Chol}\}/\{\text{Pep}_n\text{-Phos}\}$ , and also the formation of  $\{\text{Phos-Chol}\}$  as a function of time (Fig. 3). The latter confirms that monomer exchange has, in fact, occurred in the  $l_o$  phase (see the Supporting Material).

As discussed elsewhere, when three exchangeable monomers are involved in a NNR experiment (e.g.,  $\text{Pep}_n$ , Phos, and Chol), three equilibria exist that are governed by Eqs. 1–3 (Fig. 4) (10). Here, the ratio  $K_1/K_2$  (or selectivity,  $S$ ) is a measure of the peptide's preference for associating with Chol (10). Our principal findings are summarized in Table 1. Based on its selectivity ( $S$ ) values, the preference that  $\text{Pep}_n$  has in becoming a nearest-neighbor of Chol in the  $l_d$  phase is virtually the same as that found with  $\text{Pep}_c$ . In addition,  $\text{Pep}_n$  shows the same lack of selectivity

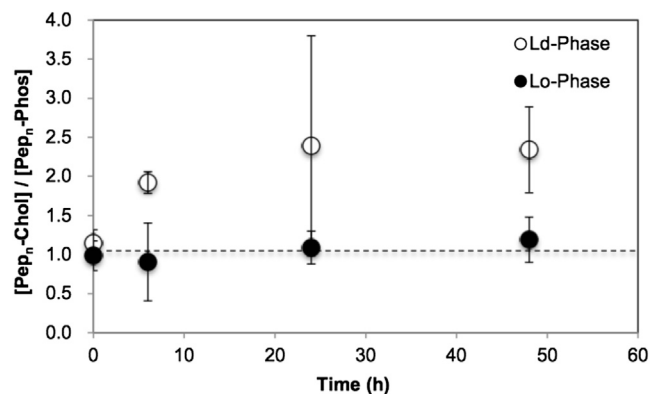

**FIGURE 3** Plot of the molar ratio,  $\{\text{Pep}_n\text{-Chol}\}/\{\text{Pep}_n\text{-Phos}\}$ , as a function of time at 45°C in (●) cholesterol-rich and (○) cholesterol-poor bilayers.

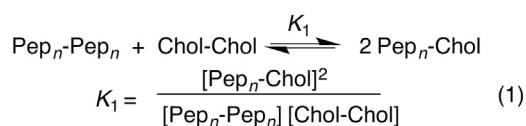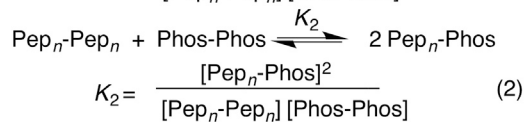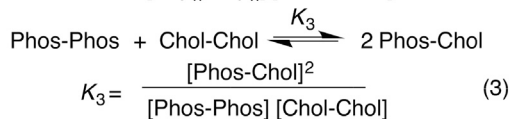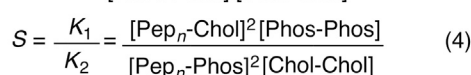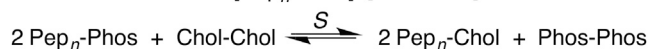

**FIGURE 4** Dimer equilibria.

that  $\text{Pep}_c$  exhibits in the  $l_o$  phase. Thus, turning around the peptide has no significant influence on its selectivity properties.

To gain insight into the favored location of the LYWIK motif in the  $l_d$  phase, where Chol recognition was found, we examined the fluorescence of the tryptophan moiety. As previously shown, the  $\lambda_{\text{max}}$  value of W is very sensitive to the polarity of its microenvironment; i.e., aqueous, interfacial, and hydrophobic microenvironments are reflected by  $\lambda_{\text{max}}$  values of near 355, 345, and 335 nm, respectively (12).

Using host liposomes made from DPPC that were maintained at 45°C, the  $\lambda_{\text{max}}$  values for  $\{\text{Pep}_c\text{-Phos}\}$ ,  $\{\text{Pep}_c\text{-Chol}\}$ ,  $\{\text{Pep}_n\text{-Phos}\}$ , and  $\{\text{Pep}_n\text{-Chol}\}$  were  $353 \pm 0.09$ ,  $351 \pm 0.01$ ,  $345 \pm 0.77$ , and  $335 \pm 0.44$  nm, respectively. These results reveal a floppy LWYIK segment that favors the membrane-water interface. Thus, the very wet W in  $\{\text{Pep}_c\text{-Phos}\}$  and  $\{\text{Pep}_c\text{-Chol}\}$  can be accounted for by a polar lysine group that separates the hydrophobic IYWL segment from the hydrocarbon interior of the membrane, thereby reducing hydrophobic interactions between them (Fig. 5) (13). The drier W groups that are found in  $\{\text{Pep}_n\text{-Phos}\}$  and  $\{\text{Pep}_n\text{-Chol}\}$  have their lysine group distal from the headgroup of the lipids. This positioning can allow for greater hydrophobic interactions between IYWL and the membrane interior; here K can hang out in the aqueous phase. Finally, the driest W that was found in

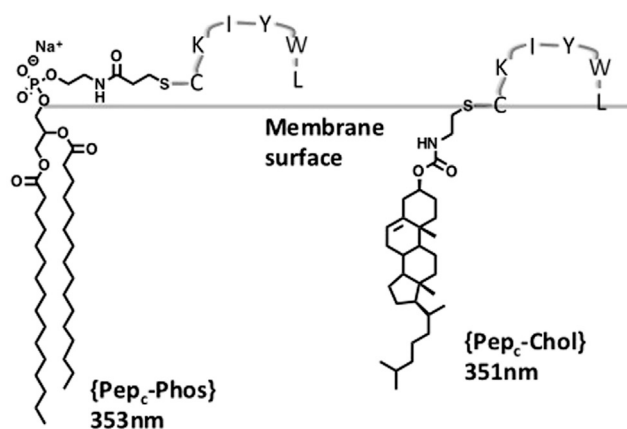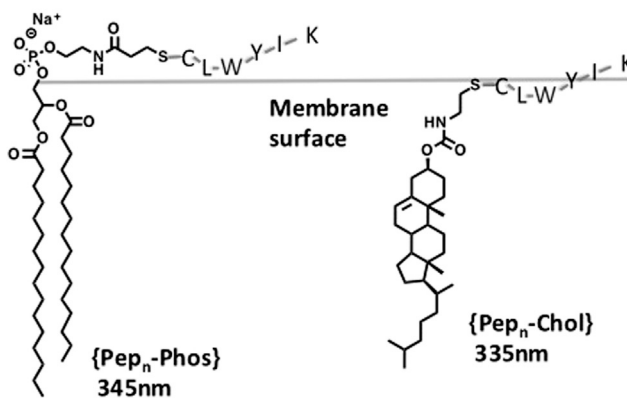

**FIGURE 5** A stylized illustration showing four lipid-peptide conjugates at a water/membrane interface with hypothetical peptide conformations.

$\{\text{Pep}_n\text{-Chol}\}$  is a likely result of having a distal lysine group and having the peptide attached to Chol, which can penetrate deeper into the membrane.

The fact that turning around LWYIK does not alter its selectivity and that it favors the membrane surface constitutes strong evidence that its recognition behavior is, fundamentally, a surface phenomenon. The fact that such recognition occurs only in the  $l_d$  phase further implies that partial penetration into the bilayer is necessary. From a biological standpoint, these results provide a firm basis for believing that CRAC motifs, typically found in the juxta-membrane region of proteins, play an important role in defining the protein's lateral organization.

**TABLE 1** Recognition of Chol by  $\text{Pep}_n$  and  $\text{Pep}_c$

| Phase   | Peptide        | $K_1$           | $K_2$           | $K_3$           | $R^a$           | $S$             |
|---------|----------------|-----------------|-----------------|-----------------|-----------------|-----------------|
| $l_d$   | $\text{Pep}_n$ | $0.68 \pm 0.25$ | $0.10 \pm 0.04$ | $2.39 \pm 0.83$ | $2.34 \pm 0.55$ | $7.01 \pm 3.99$ |
| $l_o$   | $\text{Pep}_n$ | $0.67 \pm 0.25$ | $0.85 \pm 0.49$ | $9.23 \pm 4.22$ | $1.19 \pm 0.29$ | $0.79 \pm 0.54$ |
| $l_d^b$ | $\text{Pep}_c$ | $2.08 \pm 0.71$ | $0.23 \pm 0.07$ | $3.05 \pm 1.15$ | $2.50 \pm 0.37$ | $8.89 \pm 4.08$ |
| $l_o^b$ | $\text{Pep}_c$ | $0.21 \pm 0.12$ | $0.26 \pm 0.07$ | $7.40 \pm 1.55$ | $0.95 \pm 0.45$ | $0.81 \pm 0.78$ |

<sup>a</sup>Molar ratio of  $\text{Pep}_n\text{-Chol}/\text{Pep}_n\text{-Phos}$  or  $\text{Pep}_c\text{-Chol}/\text{Pep}_c\text{-Phos}$ .

<sup>b</sup>Data taken from Mukai et al. (10).

## SUPPORTING MATERIAL

Supporting Materials and Methods, one scheme, seven figures, and six tables, are available at [http://www.biophysj.org/biophysj/supplemental/S0006-3495\(16\)30284-3](http://www.biophysj.org/biophysj/supplemental/S0006-3495(16)30284-3).

## AUTHOR CONTRIBUTIONS

M.M. carried out all NMR studies; K.J.G. recorded fluorescence measurements; and S.L.R. designed the research and wrote the article.

## ACKNOWLEDGMENTS

We are grateful to Dr. Maxim Chudaev for valuable technical assistance.

We are also grateful to the National Science Foundation (grant No. CHE-1145500 to S.L.R.) and the National Institutes of Health (grant No. R01-GM093258-01A1 to K.J.G.) for financial support.

## REFERENCES

1. Nicolson, G. L. 2014. The fluid-mosaic model of membrane structure: still relevant to understanding the structure, function and dynamics of biological membranes after more than 40 years. *Biochim. Biophys. Acta.* 1838:1451–1466.
2. Goñi, F. M. 2014. The basic structure and dynamics of cell membranes: an update of the Singer-Nicolson model. *Biochim. Biophys. Acta.* 1838:1467–1476.
3. Brown, D. A., and E. London. 2000. Structure and function of sphingolipid- and cholesterol-rich membrane rafts. *J. Biol. Chem.* 275:17221–17224.
4. Lingwood, D., and K. Simons. 2010. Lipid rafts as a membrane-organizing principle. *Science.* 327:46–50.
5. Li, H., and V. Papadopoulos. 1998. Peripheral-type benzodiazepine receptor function in cholesterol transport. Identification of a putative cholesterol recognition/interaction amino acid sequence and consensus pattern. *Endocrinology.* 139:4991–4997.
6. Fantini, J., and F. J. Barrantes. 2013. How cholesterol interacts with membrane proteins: an exploration of cholesterol-binding sites including CRAC, CARC, and tilted domains. *Front. Physiol.* 4:31.
7. Chen, S. S., P. Yang, ..., S.-C. Huang. 2009. Identification of the LWYIK motif located in the human immunodeficiency virus type 1 transmembrane gp41 protein as a distinct determinant for viral infection. *J. Virol.* 83:870–883.
8. Epan, R. F., A. Thomas, ..., R. M. Epan. 2006. Juxtamembrane protein segments that contribute to recruitment of cholesterol into domains. *Biochemistry.* 45:6105–6114.
9. Krause, M. R., and S. L. Regen. 2014. The structural role of cholesterol in cell membranes: from condensed bilayers to lipid rafts. *Acc. Chem. Res.* 47:3512–3521.
10. Mukai, M., M. R. Krause, and S. L. Regen. 2015. Peptide recognition of cholesterol in fluid phospholipid bilayers. *J. Am. Chem. Soc.* 137:12518–12520.
11. Sankaram, M. B., and T. E. Thompson. 1991. Cholesterol-induced fluid-phase immiscibility in membranes. *Proc. Natl. Acad. Sci. USA.* 88:8686–8690.
12. Ladokhin, A. S., S. Jayasinghe, and S. H. White. 2000. How to measure and analyze tryptophan fluorescence in membranes properly, and why bother? *Anal. Biochem.* 285:235–245.
13. de Planque, M. R. R., J. A. W. Kruijtzter, ..., J. A. Killian. 1999. Different membrane anchoring positions of tryptophan and lysine in synthetic transmembrane  $\alpha$ -helical peptides. *J. Biol. Chem.* 274:20839–20846.

**Biophysical Journal, Volume 110**

**Supplemental Information**

**Evidence for Surface Recognition by a Cholesterol-Recognition  
Peptide**

**Masaru Mukai, Kerney Jebrell Glover, and Steven L. Regen**

# **Evidence for Surface Recognition by a Cholesterol-Recognition (CRAC) Peptide**

Masaru Mukai, Kerney Jebrell Glover and Steven L. Regen\*

Department of Chemistry, Lehigh University, Bethlehem, Pennsylvania 18015, United States

## Supporting information

### Table of Contents

|   |                                                         |       |
|---|---------------------------------------------------------|-------|
| 1 | General information.....                                | SI-2  |
| 2 | Experimental procedures.....                            | SI-3  |
|   | 2.1 Synthetic procedures.....                           | SI-3  |
|   | 2.2 Nearest-neighbor recognition (NNR) experiments..... | SI-6  |
| 3 | NMR spectra of compounds.....                           | SI-8  |
| 4 | Calibration of chromatographic system.....              | SI-10 |
| 5 | Data for NNR measurements.....                          | SI-13 |
| 6 | Fluorescence experiments.....                           | SI-16 |
|   | References.....                                         | SI-18 |

## **1. General information**

To determine the exchangeable dimer content in the nearest-neighbor recognition reactions, HPLC analysis was used with a 5  $\mu\text{m}$ , 4.6  $\times$  250 mm ultra-sphere 5 ODS column. The instrument used was a Waters Alliance HPLC system consisting of a Waters 717 plus auto sampler, a Waters 1525 binary HPLC pump and a Waters 2487 Dual  $\lambda$  Absorbance detector.  $^1\text{H}$  NMR spectra were recorded on a Bruker Avance 500 MHz instrument. All mass spectral measurements were performed by an Agilent LC-TOF high resolution TOF analyzer at the University of California-Riverside. Deionized water was purified by a Millipore Milli-Q filtering system having one carbon and two ion-exchange stages.

## 2. Experimental procedures

### 2.1 Synthetic procedures

The exchangeable dimers were prepared as shown in Scheme SI-1. The exchangeable dimer **Chol-Chol**, **Chol-Phos** and **Phos-Chol** were prepared as described elsewhere.<sup>1,2</sup> Compounds **1** and **2** were prepared as described elsewhere.<sup>2,3</sup> **Pep<sub>c</sub>-Phos** and **Pep<sub>c</sub>-Chol** were prepared as described elsewhere.<sup>4</sup>

Scheme SI-1

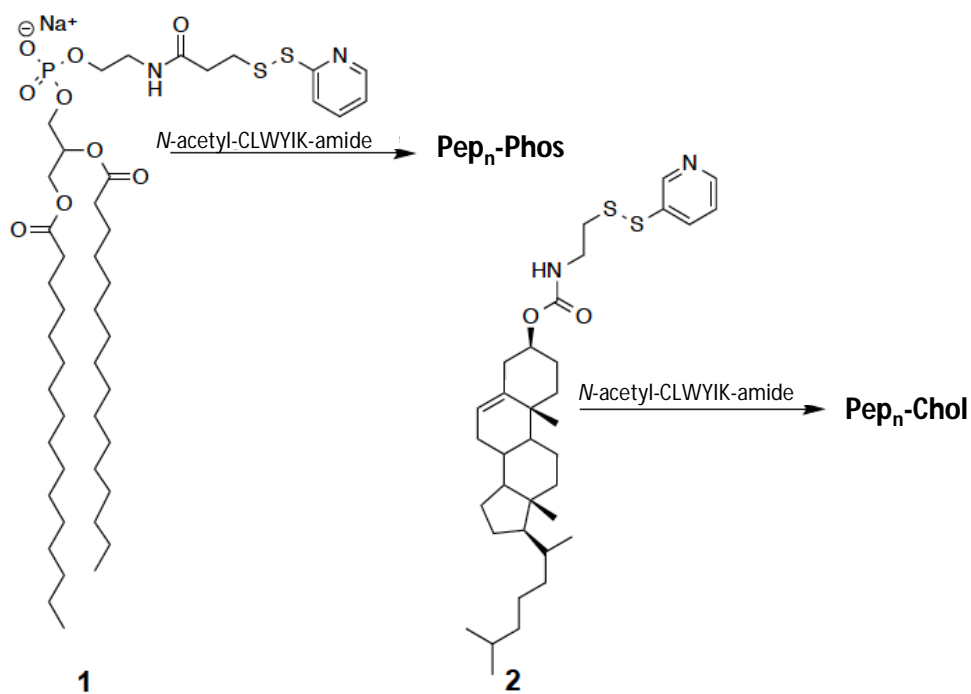



**Compound Pep<sub>n</sub>-Phos:** The peptide monomer *N*-acetyl-CLWYIK-amide (58 mg, 66.9 μmol, GenScript, Corp., Piscataway, NJ) in DMF (0.5 mL) was added dropwise to a solution of compound **1** (43 mg, 70 μmol) in 1 mL of CHCl<sub>3</sub> (1 mL). The resulting mixture was stirred overnight at room temperature under an atmosphere of argon. The crude product was purified by column chromatography (silica gel, CHCl<sub>3</sub> : MeOH : H<sub>2</sub>O = 2/1/0.1, v/v/v) affording typical yields of ca. 40% of **Pep<sub>n</sub>-Phos** having <sup>1</sup>H NMR (CDCl<sub>3</sub> : d-methanol = 2 : 1, v/v, 500 MHz, 22.5 °C) δ ppm: 0.81-0.93 (m, 18 H, Leu-δCH<sub>3</sub>, Ile-γCH<sub>3</sub>, Ile-δCH<sub>3</sub>, CH<sub>2</sub>CH<sub>2</sub>(CH<sub>2</sub>)<sub>12</sub>CH<sub>3</sub>), 1.33-1.75 (m, 50 H, Ile-γCH<sub>2</sub>, CH<sub>2</sub>CH<sub>2</sub>(CH<sub>2</sub>)<sub>12</sub>CH<sub>3</sub>), 1.35-2.03 (m, 13 H, any-CβH, Leu-γCH, Ile-γCH<sub>2</sub>, Lys-γCH<sub>2</sub>, Lys-δCH<sub>2</sub>, CH<sub>2</sub>CH<sub>2</sub>(CH<sub>2</sub>)<sub>12</sub>CH<sub>3</sub>), 2.03 (s, 3 H, Acetyl), 2.28 (br q, 4 H, CH<sub>2</sub>CH<sub>2</sub>(CH<sub>2</sub>)<sub>12</sub>CH<sub>3</sub>), 2.49-2.66 (br m, 2 H, C=OCH<sub>2</sub>CH<sub>2</sub>S), 2.69-3.02 (m, 7 H, C=OCH<sub>2</sub>CH<sub>2</sub>S, any-CβH, Lys-εCH<sub>2</sub>, overlap DMF peak), 3.41 (t, 2 H, <sup>3</sup>J = 5.5 Hz, CH<sub>2</sub>N), 3.36-3.45 (m, 2 H, any-CβH), 3.83-4.09 (m, 6 H, CH<sub>2</sub>OPOCH<sub>2</sub>, CH<sub>2</sub>CH, any-αCH), 4.09-4.19 (m, 2 H, any-αCH), 4.32-4.30 (m, 1 H, any-αCH), 4.37 (br, 1 H, CH<sub>2</sub>CH), 4.04-4.53 (m, 2 H, any-αCH), 5.21 (s, 1 H, overlap water peak, CH<sub>2</sub>CH), 6.41-6.58 (m, 3 H, Tyr-Ar, (CH<sub>2</sub>)<sub>2</sub>NH), 6.95 (d, 2 H, <sup>3</sup>J = 8.4 Hz, Tyr-Ar), 7.04 (t, 1 H, <sup>3</sup>J = 7.3 Hz, Tyr-Ar), 7.08-7.17 (m, 2 H, Tyr-Ar), 7.33 (d, 1 H, <sup>3</sup>J = 7.3 Hz, any amide), 7.35-7.41 (m, 2 H, Tyr-Ar), 7.48 (d, 1 H, overlap CHCl<sub>3</sub>, each amide), 7.57 (d, 1 H, <sup>3</sup>J = 5.1 Hz, any amide), 7.82 (d, 1 H, <sup>3</sup>J = 8.1 Hz, any amide), 8.45 (d, 1 H, <sup>3</sup>J = 4.4 Hz, any amide) and HR-ESI MS for C<sub>83</sub>H<sub>138</sub>N<sub>10</sub>O<sub>17</sub>PS<sub>2</sub> ([M-Na]<sup>+</sup>) Calculated: 1641.9426; Found: 1641.9395.

**Compound Pep<sub>n</sub>-Chol:** The peptide monomer *N*-acetyl-CLWYIK-amide (76 mg, 120 μmol, GenScript, Corp., Piscataway, NJ) in DMF (1 mL) was added drop wise to solution of compound **2** (100 mg, 120 μmol) in CHCl<sub>3</sub> (1 mL). The resulting mixture was stirred overnight at room temperature under an atmosphere of argon. The crude product was purified by column chromatography (silica gel, CHCl<sub>3</sub> : MeOH : H<sub>2</sub>O = 3/1/0.1, v/v/v) affording typical yields of ca. 40% of **Pep<sub>n</sub>-Phos** having <sup>1</sup>H NMR (CDCl<sub>3</sub> : d-methanol = 2 : 1, v/v, 500 MHz, 22.5 °C) δ ppm: 0.64 (s, 3H, Cholesterol-13C methyl), 0.84-1.60 (m, 34H, any cholesterol, Leu-δCH<sub>3</sub>, Ile-γCH<sub>3</sub>), 0.84-1.60 (m, 21H, any cholesterol, any-CβH, Ile-δCH<sub>3</sub>, Ile-γCH<sub>2</sub>, Leu-γCH, Ile-γCH<sub>2</sub>, Lys-γCH<sub>2</sub>, Lys-δCH<sub>2</sub>), 1.60-2.06 (m, 12 H, any cholesterol, Acetyl, any-CβH), 2.19-3.05 (m, 10H, Cholesterol-4CH<sub>2</sub>, any-CβH, SCH<sub>2</sub>CH<sub>2</sub>, Lys-εCH<sub>2</sub>), 3.05-3.26 (m, 3 H, SCH<sub>2</sub>CH<sub>2</sub> any-

C $\beta$ H), 3.03-3.28 (m, 2 H, any-C $\beta$ H), 3.83-4.02 (m, 2 H, any- $\alpha$ CH), 4.09-4.26 (m, 3 H, any- $\alpha$ CH), 4.55-4.69 (br, 1 H, any- $\alpha$ CH, overlap methanol), 5.31 (s, 1 H, Cholesterol-6CH), 6.72 (d, 2H,  $^3J = 7.3$  Hz, Tyr-Ar), 7.04 (s, 1 H, Typ-Ar), 6.92 (d, 2 H,  $^3J = 7.3$  Hz, Tyr-Ar), 7.00-7.19 (m, 3 H, Typ-Ar), 7.32-7.51 (m, 4 H, overlap CHCl<sub>3</sub>, Typ-Ar, any-*amide*), 7.56 (d, 1 H,  $^3J = 5.4$  Hz, any *amide*), 7.75 (d, 1 H,  $^3J = 6.6$  Hz, any *amide*) and HR-ESI MS for C<sub>73</sub>H<sub>113</sub>N<sub>10</sub>O<sub>10</sub>S<sub>2</sub> ([M+H]<sup>+</sup>) Calculated: 1353.8077; Found: 1353.8116

## 2.2 Nearest-neighbor recognition (NNR) experiments

Thin films of lipid were prepared by evaporating a chloroform solution containing 0.15  $\mu\text{mol}$  [**Pep<sub>n</sub>-Chol**], 0.15  $\mu\text{mol}$  [**Pep<sub>n</sub>-Phos**] and varying amounts of DPPC and cholesterol under a stream of argon. After drying the thin film overnight under reduced pressure (0.4 mm Hg), 2.0 mL of a 10 mM Tris-HCl buffer (10 mM Tris, 500 mM NaCl, 2 mM NaN<sub>3</sub>, 1 mM EDTA, pH = 7.4), a 60  $\mu\text{L}$  aliquot of 1.68  $\mu\text{M}$  monesin and dithiothreitol (15  $\mu\text{L}$  of a 19.8 mM solution in pH 7.4 Tris buffer, 1 eq. with respect to disulfide content) were added to each of the dried films. The mixtures were then vortexed every 5 min for 30 s over a time span of 30 min with intermittent incubation at 60 °C. Following this, the dispersions were subjected to six freeze/thaw cycles (liquid nitrogen/60 °C water bath). The vesicle dispersions (2 mL) were heated to 45 °C, and oxygen was removed by purging with argon. A sufficient amount of 0.1 M NaOH (63  $\mu\text{L}$ ) was added to bring the pH to 7.4 (after adjusting the temperature to 45 °C) to start the exchange reaction.

Aliquots (400  $\mu\text{L}$ ) were withdrawn as a function of time and the exchange reactions were quenched by adding 25  $\mu\text{L}$  of 8.3 M acetic acid and vortexing. These aliquots were quickly frozen, using liquid nitrogen and stored at -20 °C until HPLC analysis was carried out. For HPLC analysis, to each thawed aliquot was added 2000  $\mu\text{L}$  of CHCl<sub>3</sub>/MeOH (2:1 v/v) and Aldrithiol-2 (2,2-dipyridyldisulfide, 74  $\mu\text{L}$  of a 10 mM solution in CHCl<sub>3</sub>). The tubes were vortexed, centrifuged, and the aqueous phases removed using a Pasteur pipette. The organic phase was then concentrated under reduced pressure using a Savant SVC-100 SpeedVac concentrator equipped with a cold trap and vacuum pump (~1 hr at ~0.4 Torr). The residual compounds were dissolved in 60  $\mu\text{L}$  of CHCl<sub>3</sub> and 140  $\mu\text{L}$  of the HPLC mobile phase for analysis of [**Pep<sub>n</sub>-Chol**] and [**Pep<sub>n</sub>-Phos**]. The solution was divided into two tubes (each 100  $\mu\text{L}$ ).

The concentrations of [**Chol-Chol**], [**Phol-Phos**] and [**Chol-Phos**] were analyzed by HPLC using a Symmetry C<sub>18</sub> 5  $\mu\text{m}$  reversed phase column. The analysis was done in an isocratic mode using a mobile phase consisting of 760 mL of EtOH, 120 mL of deionized H<sub>2</sub>O, 100 mL of hexane, and 10 mL 1 M aq. N(n-Bu)<sub>4</sub>OAc. The flow-rate was 0.9 ml/min, the column temperature was 31 °C, and detection was done at 203 nm.

The concentrations of [**Pep<sub>n</sub>-Chol**] and [**Pep<sub>n</sub>-Phos**] were analyzed by HPLC using a Symmetry C<sub>18</sub> 5  $\mu\text{m}$  reversed phase column. The analysis was done in an isocratic mode using a mobile phase consisting of 890 mL of EtOH, 100 mL of deionized H<sub>2</sub>O, 1 mL of

TFA, and 10 mL 1 M aq. N(n-Bu)<sub>4</sub>OAc. The flow-rate was 0.9 ml/min, the column temperature was 31 °C, and detection was done at 280 nm.

In this study, liposomes that were rich in cholesterol were prepared from DPPC/cholesterol/Pep<sub>n</sub>-Phos/Pep<sub>n</sub>-Chol (57.5/37.5/1.25/1.25, mol/mol/mol/mol; cholesterol-poor analogs were made from DPPC/Pep<sub>n</sub>-Phos/Pep<sub>n</sub>-Chol (95.0/1.25/1.25, mol/mol/mol).

### 3. NMR spectra of compounds

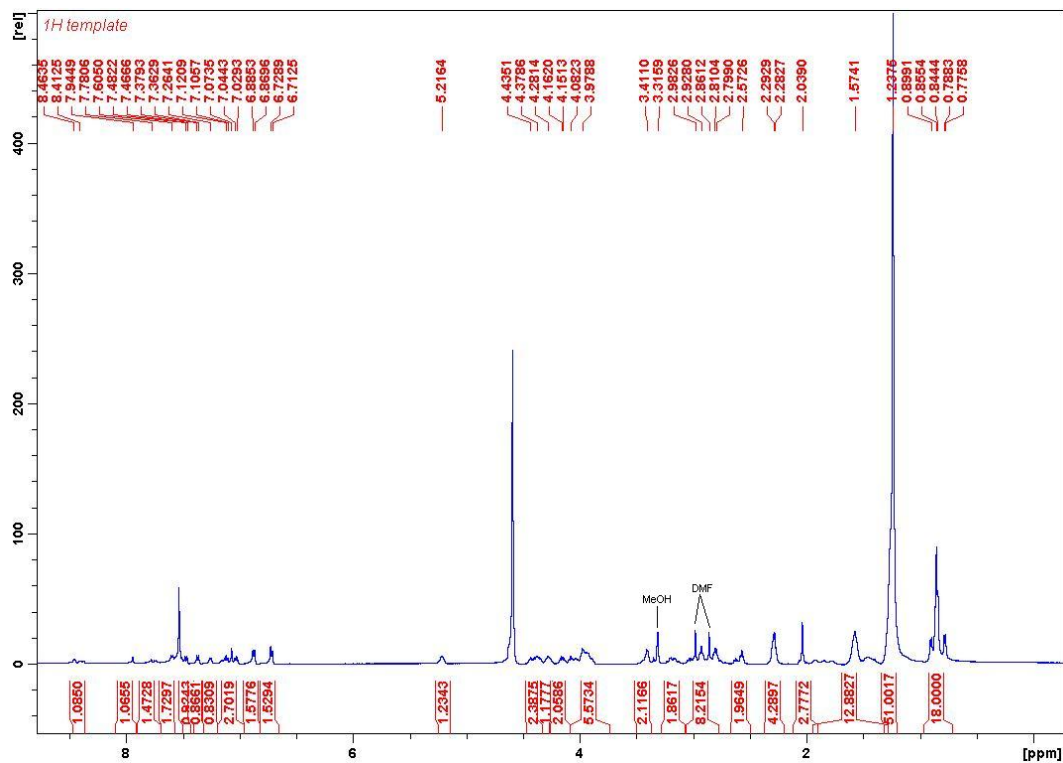

Figure SI-1: <sup>1</sup>H NMR spectrum of Pep<sub>n</sub>-Phos

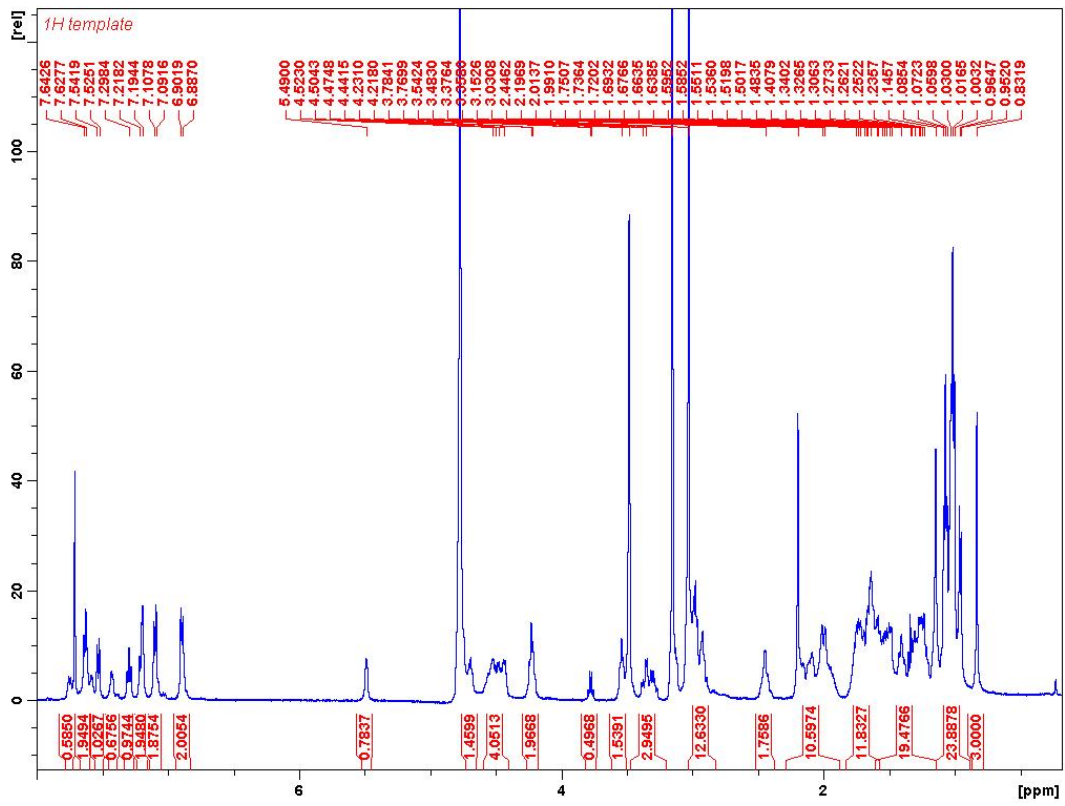

Figure SI-2:  $^1\text{H}$  NMR spectrum of Pep<sub>n</sub>-Chol

#### 4. Calibration of chromatographic system

The chromatographic system was calibrated by injecting various known amounts of the specific dimers in eluent and analyzed by HPLC. The system was found to respond as follows: for **[Phos-Phos]**,  $478140 \times n[\text{Phos-Phos}] - 518 = \text{Signal}$  ( $R^2 = 0.9984$ ); for **[Chol-Chol]**,  $591890 \times n[\text{Chol-Chol}] - 90867 = \text{Signal}$  ( $R^2 = 0.9988$ ); for **[Chol-Phos]**,  $533520 \times n[\text{Chol-Phos}] - 12637 = \text{Signal}$  ( $R^2 = 0.9988$ ); for **[Pep<sub>n</sub>-Phos]**,  $2279499 \times n[\text{Pep}_n\text{-Phos}] + 78797 = \text{Signal}$  ( $R^2 = 0.9990$ ); for **[Pep<sub>n</sub>-Chol]**,  $290097 \times n[\text{Pep}_n\text{-Chol}] + 33510 = \text{Signal}$  ( $R^2 = 0.9992$ ). Where signal is the area of the peaks for the dimers and  $n[\text{Phos-Phos}]$ ,  $n[\text{Chol-Chol}]$ ,  $n[\text{Chol-Phos}]$ ,  $n[\text{Pep}_n\text{-Phos}]$ ,  $n[\text{Pep}_n\text{-Chol}]$  are the number of nmol of the dimers. Calibration data for **[Pep<sub>n</sub>-Phos]**, **[Pep<sub>n</sub>-Chol]** are given in Table SI-2 and the calibration curves are shown in Figure SI-3. Details for the calibration of **[Chol-Chol]**, **[Chol-Phos]**, **[Phos-Phos]** were shown in previous publications.<sup>4,5</sup>

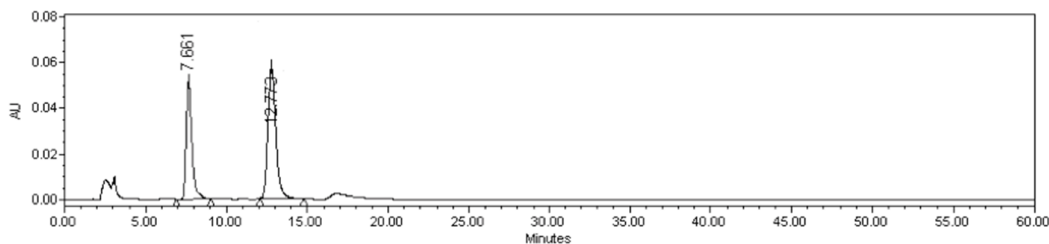

**Figure SI-3:** A sample chromatogram of **Pep<sub>n</sub>-Chol** (Retention time: 7.66 min) and **Pep<sub>n</sub>-Phos** (Retention time: 12.77 min).

**Table SI-1:** Data for calibration curves of **Pep<sub>n</sub>-Chol.**

| nmol | Area    |         |         |
|------|---------|---------|---------|
|      | run1    | run2    | run3    |
| 9.65 | 2995492 | 2650169 | 2779992 |
| 4.82 | 1458704 | 1505427 | 1465802 |
| 2.41 | 742155  | 770430  | 747029  |
| 1.21 | 388958  | 405141  | 355959  |
| 0.60 | 201200  | 230850  | 200446  |
| 0    | 12222   | -12841  | -11727  |

**Table SI-2:** Data for calibration curves of **Pep<sub>n</sub>-Phos.**

| nmol | Area    |         |         |
|------|---------|---------|---------|
|      | run1    | run2    | run3    |
| 14.0 | 3944933 | 4038905 | 3964580 |
| 7.0  | 2007459 | 2030981 | 2025342 |
| 3.5  | 1086574 | 1149249 | 1062515 |
| 1.8  | 590421  | 626501  | 568251  |
| 0.78 | 363124  | 314176  | 317288  |
| 0    | 127     | -12744  | 1050    |



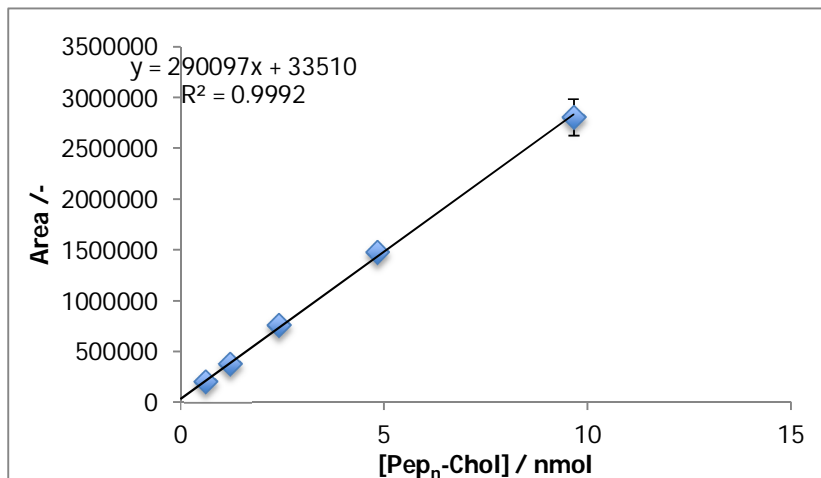

|           | Slope  | Intercept |
|-----------|--------|-----------|
| Parameter | 290097 | 33510     |
| Std. Dev  | 4958   | 22556     |
| $R^2$     | 0.9953 | 69687     |

**Figure SI-4:** Calibration curves for  $\text{Pep}_n\text{-Chol}$

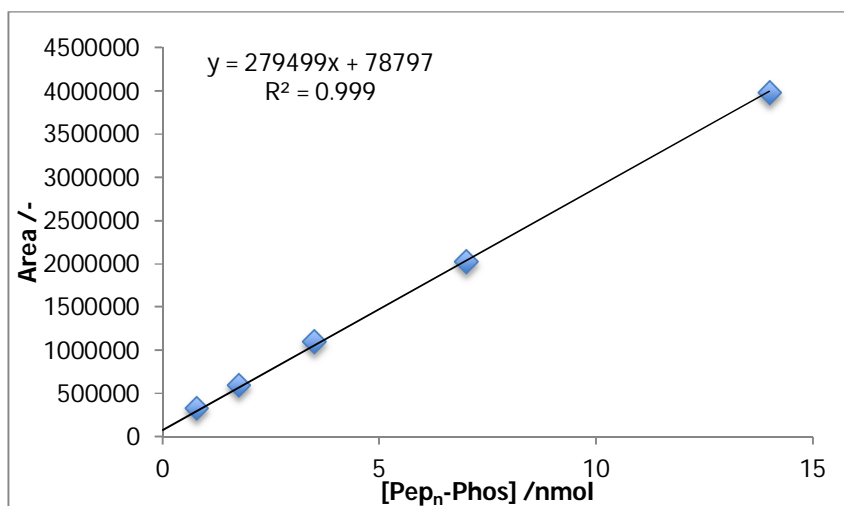

|           | Slope  | Intercept |
|-----------|--------|-----------|
| Parameter | 279499 | 78797     |
| Std. Dev  | 2607   | 17194     |
| $R^2$     | 0.9986 | 53279     |

**Figure SI-5:** Calibration curves for  $\text{Pep}_n\text{-Phos}$

## 5. Data for NNR measurements

**Table SI-3:** Concentration of exchangeable dimers after 48-hour reaction and resulting equilibrium constants ( $K_1$ ,  $K_2$  and  $K_3$ ), selectivity (S), and ratio (R: **Pep<sub>n</sub>-Chol/Pep<sub>n</sub>-Phos**) in the liquid-disordered state ( $l_d$ ).<sup>a</sup>

|                                                    | Area               |         |        |         | Average | Std. dev.               |
|----------------------------------------------------|--------------------|---------|--------|---------|---------|-------------------------|
|                                                    | run1               | run2    | run3   | run4    |         |                         |
| <b>Phos-Phos</b>                                   | 541315             | 711129  | 583180 | 634588  | 617553  | 88469                   |
| <b>Phos-Chol</b>                                   | 846178             | 1035772 | 800494 | 1026648 | 927273  | 124759                  |
| <b>Chol-Chol</b>                                   | 442521             | 555770  | 439926 | 478180  | 479099  | 66146                   |
| <b>Pep<sub>n</sub>-Chol</b>                        | 343834             | 480894  | 537629 | 434773  | 449283  | 99633                   |
| <b>Pep<sub>n</sub>-Phos</b>                        | 197600             | 276950  | 262724 | 216011  | 238321  | 42308                   |
|                                                    | $l_d$ phase (nmol) |         |        |         | Average | Std. Error <sup>a</sup> |
|                                                    | run1               | run2    | run3   | run4    |         |                         |
| <b>Phos-Phos</b>                                   | 1.13               | 1.49    | 1.22   | 1.32    | 1.29    | 0.20                    |
| <b>Phos-Chol</b>                                   | 1.61               | 1.97    | 1.52   | 1.94    | 1.76    | 0.20                    |
| <b>Chol-Chol</b>                                   | 0.90               | 1.26    | 0.90   | 0.96    | 1.00    | 0.22                    |
| <b>Pep<sub>n</sub>-Chol</b>                        | 1.07               | 1.54    | 1.73   | 1.57    | 1.48    | 0.20                    |
| <b>Pep<sub>n</sub>-Phos</b>                        | 0.42               | 0.70    | 0.65   | 0.75    | 0.63    | 0.12                    |
| <b>Pep<sub>n</sub>-Pep<sub>n</sub><sup>b</sup></b> | 2.84               | 3.73    | 2.88   | 3.25    | 3.18    | 0.41                    |
| $K_1=$                                             | -                  | -       | -      | -       | 0.68    | 0.25                    |
| $K_2=$                                             | -                  | -       | -      | -       | 0.10    | 0.04                    |
| $K_3=$                                             | -                  | -       | -      | -       | 2.39    | 0.83                    |
| Ratio=                                             | -                  | -       | -      | -       | 2.34    | 0.55                    |
| S=                                                 | -                  | -       | -      | -       | 7.01    | 3.99                    |

<sup>a</sup> Standard errors for concentrations were calculated from the standard deviation of the Y value average and the standard errors of the slope and intercept of the calibration curve.<sup>4</sup>

<sup>b</sup> **Pep<sub>n</sub>-Pep<sub>n</sub>** amounts were estimated using mass balance, and represent maximum values.

**Table SI-4:** Concentration of exchangeable dimers after 48-hour reaction and resulting equilibrium constants ( $K_1$ ,  $K_2$  and  $K_3$ ), selectivity (S), and ratio (R: **Pep<sub>n</sub>-Chol/Pep<sub>n</sub>-Phos**) in the liquid-ordered state ( $l_o$ ).<sup>a</sup>

|                                                    | Area                              |         |         |         | Average | Std. dev.               |
|----------------------------------------------------|-----------------------------------|---------|---------|---------|---------|-------------------------|
|                                                    | run1                              | run2    | run3    | run4    |         |                         |
| <b>Phos-Phos</b>                                   | 266162                            | 204759  | 403853  | 403853  | 291591  | 101954                  |
| <b>Phos-Chol</b>                                   | 1327009                           | 1058385 | 1698367 | 1698367 | 1361254 | 321362                  |
| <b>Chol-Chol</b>                                   | 526755                            | -       | 673023  | 673023  | 522096  | 153310                  |
| <b>Pep<sub>n</sub>-Chol</b>                        | 318788                            | 402852  | 556355  | 632420  | 425998  | 120463                  |
| <b>Pep<sub>n</sub>-Phos</b>                        | 315504                            | 376152  | 467213  | 539011  | 386290  | 76361                   |
|                                                    | <i>l<sub>o</sub></i> phase (nmol) |         |         |         |         |                         |
|                                                    | run1                              | run2    | run3    | run4    | Average | Std. Error <sup>a</sup> |
| <b>Phos-Phos</b>                                   | 0.56                              | 0.43    | 0.85    | 0.85    | 0.67    | 0.25                    |
| <b>Phos-Chol</b>                                   | 2.51                              | 2.01    | 3.21    | 3.21    | 2.73    | 0.20                    |
| <b>Chol-Chol</b>                                   | 1.04                              | -       | 1.29    | 1.29    | 1.21    | 0.27                    |
| <b>Pep<sub>n</sub>-Chol</b>                        | 1.16                              | 1.46    | 1.80    | 2.06    | 1.62    | 0.20                    |
| <b>Pep<sub>n</sub>-Phos</b>                        | 1.10                              | 1.31    | 1.39    | 1.64    | 1.36    | 0.28                    |
| <b>Pep<sub>n</sub>-Pep<sub>n</sub><sup>b</sup></b> | 2.86                              | -       | 3.74    | 3.74    | 3.24    | 0.51                    |
| $K_1=$                                             | -                                 | -       | -       | -       | 0.67    | 0.25                    |
| $K_2=$                                             | -                                 | -       | -       | -       | 0.85    | 0.49                    |
| $K_3=$                                             | -                                 | -       | -       | -       | 9.23    | 4.22                    |
| Ratio=                                             | -                                 | -       | -       | -       | 1.19    | 0.29                    |
| S=                                                 | -                                 | -       | -       | -       | 0.79    | 0.54                    |

<sup>a</sup> Standard errors for concentrations were calculated from the standard deviation of the Y value average and the standard errors of the slope and intercept of the calibration curve.<sup>4</sup>

<sup>b</sup> **Pep<sub>n</sub>-Pep<sub>n</sub>** amounts were estimated using mass balance, and represent maximum values.

**Table SI-5:** Data for equilibration in liquid-disordered state at 45 °C

| time<br>(h) |                             | Concentration (nmol) |      |      |      |                    |                    |
|-------------|-----------------------------|----------------------|------|------|------|--------------------|--------------------|
|             |                             | run1                 | run2 | run3 | run4 | average            | std.               |
| 0 h         | <b>Pep<sub>n</sub>-Chol</b> | 3.70                 | 3.99 | 4.52 | -    | 1.14 <sup>a)</sup> | 0.17 <sup>a)</sup> |
|             | <b>Pep<sub>n</sub>-Phos</b> | 3.01                 | 3.91 | 3.82 | -    |                    |                    |
|             | <b>Phos-Chol</b>            | 0.66                 | 0.63 | 0.67 | -    |                    |                    |
| 6 h         | <b>Pep<sub>n</sub>-Chol</b> | 3.29                 | 3.57 | 3.82 | -    | 1.92 <sup>a)</sup> | 0.14 <sup>a)</sup> |
|             | <b>Pep<sub>n</sub>-Phos</b> | 1.78                 | 1.98 | 1.80 | -    |                    |                    |
|             | <b>Phos-Chol</b>            | 1.40                 | 1.39 | 1.34 | -    |                    |                    |
| 24 h        | <b>Pep<sub>n</sub>-Chol</b> | 0.97                 | 2.49 | -    | -    | 2.39 <sup>a)</sup> | 1.41 <sup>a)</sup> |
|             | <b>Pep<sub>n</sub>-Phos</b> | 0.72                 | 0.75 | 0.70 | -    |                    |                    |
|             | <b>Phos-Chol</b>            | 2.35                 | 1.53 | 1.83 | -    |                    |                    |
| 48 h        | <b>Pep<sub>n</sub>-Chol</b> | 1.07                 | 1.54 | 1.73 | 1.57 | 2.34 <sup>a)</sup> | 0.55 <sup>a)</sup> |
|             | <b>Pep<sub>n</sub>-Phos</b> | 0.42                 | 0.70 | 0.65 | 0.75 |                    |                    |
|             | <b>Phos-Chol</b>            | 1.61                 | 1.97 | 1.52 | 1.94 |                    |                    |

a)  $[\text{Pep}_n\text{-Chol}] / [\text{Pep}_n\text{-Phos}]$

**Table SI-6:** Data for equilibration in liquid-ordered state at 45 °C

| time<br>(h) |                             | Concentration (nmol) |       |       |      |                    |                    |
|-------------|-----------------------------|----------------------|-------|-------|------|--------------------|--------------------|
|             |                             | run1                 | run2  | run3  | run4 | average            | std.               |
| 0 h         | <b>Pep<sub>n</sub>-Chol</b> | 10.10                | 10.40 | 10.30 | -    | 0.99 <sup>a)</sup> | 0.02 <sup>a)</sup> |
|             | <b>Pep<sub>n</sub>-Phos</b> | 10.30                | 10.30 | 10.43 | -    |                    |                    |
|             | <b>Phos-Chol</b>            | 0.46                 | 0.13  | 0.40  | -    |                    |                    |
| 6 h         | <b>Pep<sub>n</sub>-Chol</b> | 1.31                 | 2.10  | 1.38  | -    | 0.91 <sup>a)</sup> | 0.50 <sup>a)</sup> |
|             | <b>Pep<sub>n</sub>-Phos</b> | 0.95                 | 2.26  | 2.03  | -    |                    |                    |
|             | <b>Phos-Chol</b>            | 1.76                 | 1.80  | 2.13  | -    |                    |                    |
| 24 h        | <b>Pep<sub>n</sub>-Chol</b> | 1.19                 | 1.57  | 1.38  | -    | 1.09 <sup>a)</sup> | 0.21 <sup>a)</sup> |
|             | <b>Pep<sub>n</sub>-Phos</b> | 1.04                 | 1.43  | 1.33  | -    |                    |                    |
|             | <b>Phos-Chol</b>            | 2.36                 | 2.18  | 1.15  | -    |                    |                    |
| 48 h        | <b>Pep<sub>n</sub>-Chol</b> | 1.16                 | 1.46  | 1.80  | 2.06 | 1.19 <sup>a)</sup> | 0.29 <sup>a)</sup> |
|             | <b>Pep<sub>n</sub>-Phos</b> | 1.10                 | 1.31  | 1.39  | 1.64 |                    |                    |
|             | <b>Phos-Chol</b>            | 2.51                 | 2.01  | 3.21  | 3.21 |                    |                    |

a) [Pep<sub>n</sub>-Chol] / [Pep<sub>n</sub>-Phos]

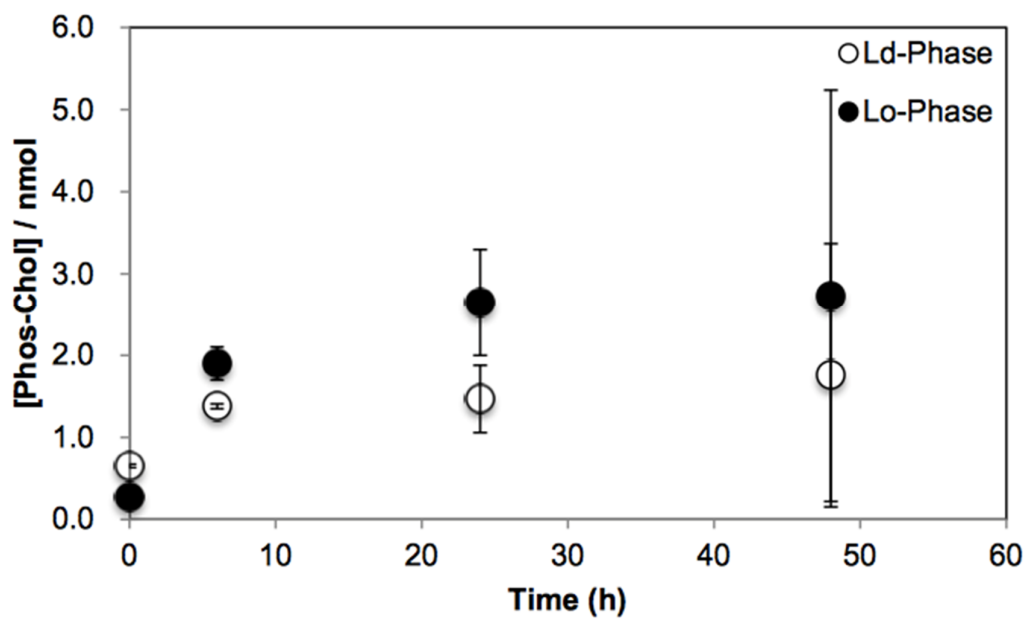

**Figure SI-6.** Plot of the formation of {Phos-Chol} as a function of time at 45 °C in (●) cholesterol-rich and (○) cholesterol-poor bilayers. Cholesterol-rich vesicles were made from DPPC/cholesterol/Pep<sub>n</sub>-Phos/Pep<sub>n</sub>-Chol with a molar ratio of 57.5/37.5/1.25/1.25. Cholesterol-poor vesicles were made from DPPC/Pep<sub>n</sub>-Phos/Pep<sub>n</sub>-Chol having a molar ratio of 95.0/1.25/1.25.

## 6. Fluorescence experiments

Thin films of lipid were prepared by evaporating a chloroform solution containing 0.3  $\mu\text{mol}$  of peptide conjugate (Pep<sub>n</sub>-Chol, Pep<sub>n</sub>-Phos, Pep<sub>c</sub>-Chol or Pep<sub>c</sub>-Phos) and 11.4  $\mu\text{mol}$  of DPPC under a stream of argon. After drying the thin film overnight under reduced pressure (0.4 mm Hg), 2.0 mL of a 10 mM Tris-HCl buffer (10 mM Tris, 150 mM NaCl, 2 mM NaN<sub>3</sub>, 1 mM EDTA, pH = 7.4) was added to each of the dried films. The mixtures were then vortexed every 5 min for 30 s over a time span of 30 min with intermittent incubation at 60 °C. Following this, the dispersions were subjected to six freeze/thaw cycles (liquid nitrogen/60 °C water bath) and extruded 15 times through a 100 nm pore diameter polycarbonate filter (Nuclepore, Whatman Inc.) using argon at a pressure of ~100 psi. Steady-state fluorescence emission spectra were acquired at 318 K using an Varian Eclipse fluorescence spectrophotometer (Agilent, Santa Clara, CA) using a 1 × 0.1 cm quartz cuvette. The excitation wavelength was 295 nm which selectively excites tryptophan residues. Both excitation and emission slits were set to 5 nm. The emission spectrum was measured from 310-400 nm with a scan speed of 2 nm/s and 1.0 nm data point increments, averaging 16 scans. The  $\lambda_{\text{max}}$  values were determined by fitting the data to a log-normal distribution using Igor Pro 6.3.7.2 (WaveMetrics, Inc., Lake Oswego, OR).

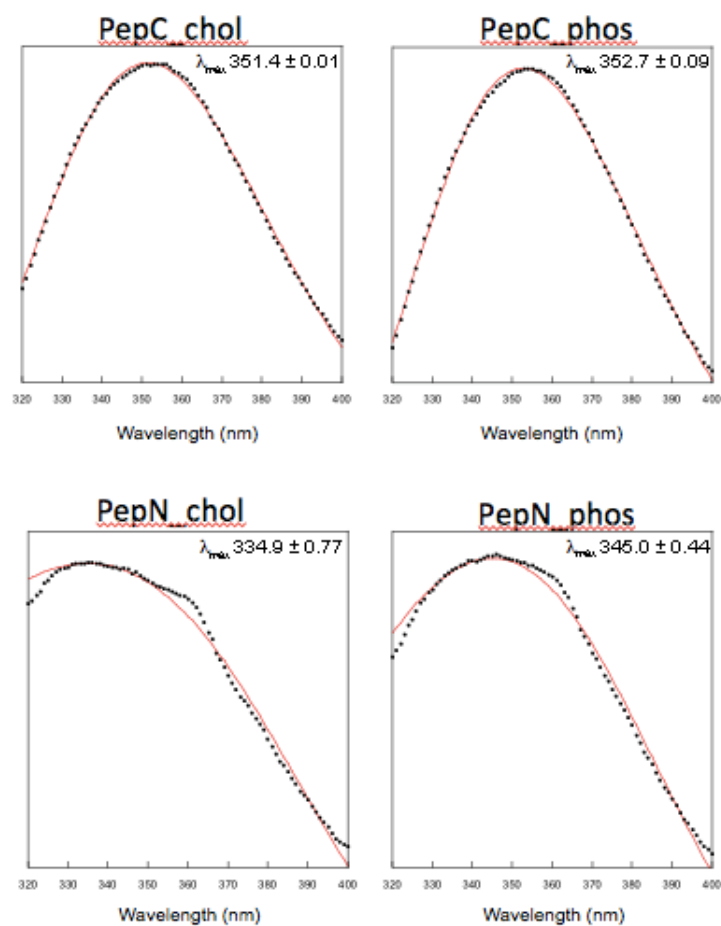

**Figure SI-7** Tryptophan emission spectra with excitation at 295 nm of CRAC peptide conjugated compounds in DPPC liposomes at 45°C. Data points are in black and the Fit line is shown in red.



## 7. References

- 1) Krisovitch, S. M.; Regen, S. L. *J. Am. Chem. Soc.* **1992**, *114*, 9828-9835.
- 2) Sugahara, M.; Uragami, M.; Yan, X.; Regen, S. L. *J. Am. Chem. Soc.* **2001**, *123*, 7939-7940.
- 3) Daly, T. A.; Almeida, P. F.; Regen, S. L. *J. Am. Chem. Soc.* **2012**, *134*, 17245-17252.
- 4) Mukai, M.; Krause, M. R.; Regen, S. L. *J. Am. Chem. Soc.*, **2015**, *137*, 12518-12520.
- 5) Turkyilmaz, S.; Chen, WH; Mitomo, H.; Regen, S.L. *J. Am. Chem. Soc.* **2009**, *131*, 5068-5069.
